# Supplementary material
Source: publisher figshare collection journal article supplement (https://gsajournals.figshare.com/ndownloader/files/34537766)
Supplement: Supplementary file 1 [file 34537766]

## Sheet: Gene Candidate Selection
Name of complementation group	Alleles sequenced	Mapped under this deficiency	Chromosome	Genes in common with coding/splicing variants on the mapped chromosome	Gene(s) that also fall within the mapped region	Gene candidate assignment from this study	Comments/Reason for candidate selection
gene-29	t1446 t1600	none of the tested deficiencies	III	cyk-3	cyk-3	(none)	Identical cyk-3 variants in both strains, therefore it is highly unlikely that they are independent mutation events and the evidence for gene assignment is weak
gene-34	t1464 t1502	none of the tested deficiencies	III	top-3	(none)	(none)	top-3 not in mapped region; we also determined it was not correct through additional complementation testing
gene-19	t1657 t1675	tDf6	III	(none)	(none)	(none)	no coding/splicing hits in common
gene-20	t1644 t1664	tDf6	III	(none)	(none)	(none)	cul-2 alleles previously sequenced/published; not found in our study due to filtering of intronic mutations
gene-33	t1441 t1638	none of the tested deficiencies	III	zyg-8	(none)	zyg-8	zyg-8 alleles previously sequenced/published; not found in our initial analysis due to deletion size and incorrect mapping region
gene-40	t1663 t1701	sDf28	III	(none)	(none)	(none)	no coding/splicing hits in common
gene-41	t1539/t1541 t1595	sDf28	III	(none)	(none)	(none)	no coding/splicing hits in common; may be glp-1 after considering intronic mutations
gene-8	t1437 t1478	sDf125	III	(none)	(none)	(none)	no coding/splicing hits in common
gene-43	t1463 (alleged double mutant with gene-11)	nDf40	III	(none)	(none)	(none)	no gene hits in common
gene-17	t1514 t1603	tDf5	III	bckd-1A	bckd-1A	bckd-1A	only gene in common with coding/splicing variants in the mapped region
gene-28	t1461 t1480	none of the tested deficiencies	III	bckd-1A	(none)	bckd-1A	determined through additional complementation tests with gene-17 alleles
gene-4	t1517 t1527	sDf110	III	cls-2	cls-2	cls-2	only gene in common with coding/splicing variants in the mapped region
gene-24	t1618 t1704	nDf16	III	cra-1	cra-1	cra-1	only gene in common with coding/splicing variants in the mapped region
gene-25	t1528 t1662/t1718	nDf16	III	cup-5	cup-5	cup-5	only gene in common with coding/splicing variants in the mapped region
gene-30	t1525 t1535	none of the tested deficiencies	III	cyk-3; nca-2	cyk-3; nca-2	cyk-3	gk5 (nca-2 deletion allele) is not lethal/sterile; cyk-3 alleles previously sequenced/published
gene-13	t1642 t1676	nDf40	III	div-1	div-1	div-1	only gene in common with coding/splicing variants in the mapped region
gene-26	t1436 t1481	nDf16	III	gsp-2	gsp-2	gsp-2	only gene in common with coding/splicing variants in the mapped region
gene-32	t1577 t1594	none of the tested deficiencies	III	gsr-1	gsr-1	gsr-1	only gene in common with coding/splicing variants in the mapped region
gene-31	t1654 t1717	none of the tested deficiencies	III	hcp-3	hcp-3	hcp-3	only gene in common with coding/splicing variants in the mapped region
gene-6	t1628 t1563	tDf6	III	klp-19	klp-19	klp-19	only gene in common with coding/splicing variants in the mapped region
gene-22	t1698 t1550	tDf6	III	lis-1; pac-1	lis-1	lis-1	only gene in common with coding/splicing variants in the mapped region; lis-1 alleles previously sequenced/published
gene-10	t1456 t1576	sDf125	III	mel-32	mel-32	mel-32	only gene in common with coding/splicing variants in the mapped region
gene-21	t1614 t1674	tDf6	III	pod-1	pod-1	pod-1	only gene in common with coding/splicing variants in the mapped region
gene-11	t1501 t1519	nDf40	III	epac-1; mua-3; rmd-1	epac-1; mua-3; rmd-1	rmd-1	previously described mutant phenotypes suggest rmd-1 is the candidate
gene-18	t1476 t1521	tDf5	III	F44E2.10; sas-1	sas-1	sas-1	only gene in common with coding/splicing variants in the mapped region; sas-1 alleles previously sequenced/published
gene-5	t1496 t1693	tDf7	III	such-1	such-1	such-1	only gene in common with coding/splicing variants in the mapped region
gene-12	t1438/t1477 t1677	nDf40	III	tlk-1	tlk-1	tlk-1	only gene in common with coding/splicing variants in the mapped region
gene-15	t1516 t1559	tDf5	III	top-3; trp-1; Y119D3B.13	top-3	top-3	top-3 is the only gene in the mapped region and both alleles have identical variants for Y119D3B.13
gene-35	t1470 t1464	none of the tested deficiencies	III	top-3	(none)	top-3	determined through additional complementation tests with gene-15 alleles
gene-27	t1435 t1561	none of the tested deficiencies	III	vps-33.1	vps-33.1	vps-33.1	only gene in common with coding/splicing variants in the mapped region
gene-23	t1433 t1587	nDf16	III	nft-1; ZK688.9	ZK688.9	ZK688.9	only gene in common with coding/splicing variants in the mapped region
gene-14	t1518 t1547	tDf5	III	zyg-8	zyg-8	zyg-8	only gene in common with coding/splicing variants in the mapped region
s	t1811 t1758	none of the tested deficiencies	IV	sart-3; swsn-4	(none)	(none)	sart-3 and swsn-4 would have mapped under sDf2
B	t1808 t1809	none of the tested deficiencies	IV	K08D8.6	(none)	(none)	K08D8.6 not in mapped region; we also determined it was not correct via complementation testing with CRISPR/Cas9 deletion allele
r	t1886 t1780	none of the tested deficiencies	IV	unc-22	(none)	(none)	unc-22 not in mapped region; likely just random luck to hit a large gene
o	t1757 t1937	none of the tested deficiencies	IV	(none)	(none)	(none)	no coding/splicing hits in common
w	t1790 t1920	sDf2 and sDf21	IV	(none)	(none)	(none)	no coding/splicing hits in common but later identified as a likely strain mix-up (found let-99 frameshift in one and mes-6 nonsense + mex-5 nonsense in another)
x	t1836 t1724	sDf21	IV	aptf-2	aptf-2	aptf-2	only gene in common with coding/splicing variants in the mapped region
H	t1738 t1726	sDf2	IV	atg-7	atg-7	atg-7	only gene in common with coding/splicing variants in the mapped region
vz	t1860 t1821	nDf41	IV	C34D4.4	C34D4.4	C34D4.4	only gene in common with coding/splicing variants in the mapped region; validated by complementation testing with CRISPR/Cas9 deletion allele
A	t1742 t1879	sDf2	IV	cpt-2	cpt-2	cpt-2	only gene in common with coding/splicing variants in the mapped region
D	t1729 t1897	stDf7 and not nDf41	IV	csr-1	csr-1	csr-1	only gene in common with coding/splicing variants in the mapped region
J	t1906 t1877	eDf19	IV	D2096.12	D2096.12	D2096.12	only gene in common with coding/splicing variants in the mapped region
C	t1732 t1801	nDf41	IV	dif-1	dif-1	dif-1	only gene in common with coding/splicing variants in the mapped region
u	t1940 t1935	eDf19	IV	F21D5.1	F21D5.1	F21D5.1	only gene in common with coding/splicing variants in the mapped region
t	t1791 t1744	eDf19	IV	F56D5.2	F56D5.2	F56D5.2	only gene in common with coding/splicing variants in the mapped region; validated by complementation testing with CRISPR/Cas9 deletion allele
G	t1795 t1914	nDf41	IV	klp-18	klp-18	klp-18	only gene in common with coding/splicing variants in the mapped region
I	t1817 t1912	sDf2 and sDf21	IV	let-99	let-99	let-99	only gene in common with coding/splicing variants in the mapped region
z	t1765 t1888	sDf21	IV	mbk-2	mbk-2	mbk-2	only gene in common with coding/splicing variants in the mapped region
M	t1793 t1800	sDf21	IV	ama-1; mex-5	mex-5	mex-5	only gene in common with coding/splicing variants in the mapped region
v	t1772 t1835	nDf41	IV	nstp-2	nstp-2	nstp-2	only gene in common with coding/splicing variants in the mapped region; validated by complementation testing with CRISPR/Cas9 deletion allele
F	t1932 t1900	nDf41	IV	perm-5	perm-5	perm-5	only gene in common with coding/splicing variants in the mapped region
E	t1750 t1885	none of the tested deficiencies	IV	lad-2; rad-51	lad-2; rad-51	rad-51	tm3056 (lad-2 deletion allele) is not lethal/sterile; rad-51 is a known maternal-effect lethal gene
q	t1786 t1866	none of the tested deficiencies	IV	T22B11.1	T22B11.1	T22B11.1	only gene in common with coding/splicing variants in the mapped region
L	t1745 t1909	eDf19	IV	trcs-1	trcs-1	trcs-1	only gene in common with coding/splicing variants in the mapped region
N	t1773 t1867	none of the tested deficiencies	IV	wapl-1	wapl-1	wapl-1	only gene in common with coding/splicing variants in the mapped region; 2nd hit found by manually looking for a large deletion
p	t1913 t1833 t1755 t1792	none of the tested deficiencies	IV	Y54G2A.73	Y54G2A.73	Y54G2A.73	only gene in common with coding/splicing variants in the mapped region; identified after sequencing additional alleles
e	t2093 t2008	sDf35	V	(none)	(none)	(none)	no coding/splicing hits in common
Y	t2095 t2135	sDf35	V	air-1	air-1	air-1	only gene in common with coding/splicing variants in the mapped region
T	t2143 t2155	sDf35	V	atl-1	atl-1	atl-1	only gene in common with coding/splicing variants in the mapped region
a	t2149 t2055 t2029 t2052	none of the tested deficiencies	V	C56A3.8	C56A3.8	C56A3.8	only gene in common with coding/splicing variants in the mapped region; identified after sequencing additional alleles; no mutations in C56A3.8 (exonic or intronic) found in t2052
V	t2074 t2129	none of the tested deficiencies	V	ccz-1	ccz-1	ccz-1	only gene in common with coding/splicing variants in the mapped region
b	t2021 t2007	itDf2	V	cept-2	cept-2	cept-2	only gene in common with coding/splicing variants in the mapped region
R	t2053 t2144	itDf2	V	cpl-1	cpl-1	cpl-1	only gene in common with coding/splicing variants in the mapped region
O	t2042 t2043	nDf32	V	dgtr-1; T13F3.2; ttn-1	dgtr-1; ttn-1	dgtr-1	T13F3.2 is outside the mapped region; ttn-1 is very large and likely hit by chance (all missense mutations); dgtr-1 has a splicing variant in one allele and the osmotic integrity defect we observed supports previous RNAi phenotypes
d	t2056 t2035	itDf2	V	dlat-1	dlat-1	dlat-1	only gene in common with coding/splicing variants in the mapped region
S	t2162 t2180	sDf35	V	mom-2	mom-2	mom-2	only gene in common with coding/splicing variants in the mapped region
W	t2092 t2137	none of the tested deficiencies	V	mre-11	mre-11	mre-11	only gene in common with coding/splicing variants in the mapped region
U	t2183 t2177 t2080 t2181	sDf35	V	F10C2.4; pos-1	pos-1	pos-1	only gene in common with coding/splicing variants in the mapped region; identified after sequencing additional alleles; t2183 may be affected by a large deletion near the promoter (no coding/splicing mutations found); no pos-1 mutations found in t2181
Z	t2147 t2175	ctDf1	V	rad-50	rad-50	rad-50	only gene in common with coding/splicing variants in the mapped region
f	t2033 t2079	none of the tested deficiencies	V	vars-1; sas-5	sas-5	sas-5	only gene in common with coding/splicing variants in the mapped region; sas-5 alleles previously sequenced/published
P	t2098 t2173	nDf32	V	spn-4	spn-4	spn-4	only gene in common with coding/splicing variants in the mapped region
g	t2025 t2165	none of the tested deficiencies	V	sqv-4	sqv-4	sqv-4	only gene in common with coding/splicing variants in the mapped region
c	t2037 t2106	none of the tested deficiencies	V	F22F7.4; T28H10.1; unc-112	T28H10.1; unc-112	unc-112	unc-112 a known sterile gene and one allele has a splicing mutation
Q	t2189 t2114 t2016 t2015	itDf2	V	vps-39	vps-39	vps-39	only gene in common with coding/splicing variants in the mapped region; identified after sequencing additional alleles; t2015 may have a large rearrangement in the vps-39 region (no SNVs/indels found)

## Sheet: All Alleles (with Publications)
Complementation Group	Strain	Allele	2nd Allele	Gene Candidate Name	Previously Sequenced Allele	Legacy Gene Name(s)	Mentioned in Publication(s)	Comments
gene-10	GE2740	t1576		mel-32	yes		Vatcher GP, Thacker CM, Kaletta T, Schnabel H, Schnabel R, Baillie DL. Serine Hydroxymethyltransferase Is Maternally Essential inCaenorhabditis elegans. Journal of Biological Chemistry. 1998 Mar 13;273(11):6066-73.
gene-10	GE1731	t1456		mel-32	yes		Vatcher GP, Thacker CM, Kaletta T, Schnabel H, Schnabel R, Baillie DL. Serine Hydroxymethyltransferase Is Maternally Essential inCaenorhabditis elegans. Journal of Biological Chemistry. 1998 Mar 13;273(11):6066-73.
gene-11	GE2219	t1501		rmd-1	no	csg-1	Gönczy, P., H. Schnabel, T. Kaletta, A. D. Amores, T. Hyman et al., 1999 Dissection of cell division processes in the one cell stage Caenorhabditis elegans embryo by mutational analysis. J. Cell Biol. 144: 927-946.	not sequenced, but in Gonczy 1999 under a different gene name (not on physical map)
gene-11	GE2347	t1519		rmd-1	no	csg-1	Gönczy, P., H. Schnabel, T. Kaletta, A. D. Amores, T. Hyman et al., 1999 Dissection of cell division processes in the one cell stage Caenorhabditis elegans embryo by mutational analysis. J. Cell Biol. 144: 927-946.	not sequenced, but in Gonczy 1999 under a different gene name (not on physical map)
gene-12	GE1734	t1438	t1477	tlk-1	no
gene-12	GE2613	t1677		tlk-1	no	arm-6 (amo-6)	Molin, L., Schnabel, H., Kaletta, T., Feichtinger, R., Hope, I.A. and Schnabel, R., 1999. Complexity of developmental control: analysis of embryonic cell lineage specification in Caenorhabditis elegans using pes-1 as an early marker. Genetics, 151(1), pp.131-141.	not sequenced, but in Molin 1999 under a different gene name (not on physical map)
gene-13	GE2577	t1642		div-1	no		Brauchle M, Baumer K, Gönczy P. Differential activation of the DNA replication checkpoint contributes to asynchrony of cell division in C. elegans embryos. Current biology. 2003 May 13;13(10):819-27.	complementation tested in Brauchle 2003 but not sequenced
gene-13	GE2612	t1676		div-1	yes		Brauchle M, Baumer K, Gönczy P. Differential activation of the DNA replication checkpoint contributes to asynchrony of cell division in C. elegans embryos. Current biology. 2003 May 13;13(10):819-27.	sequenced in Brauchle 2003 but no info on WormBase
gene-14	GE2348	t1518		zyg-8	yes		Gönczy P, Bellanger JM, Kirkham M, Pozniakowski A, Baumer K, Phillips JB, Hyman AA. zyg-8, a gene required for spindle positioning in C. elegans, encodes a doublecortin-related kinase that promotes microtubule assembly. Developmental cell. 2001 Sep 1;1(3):363-75.
gene-14	GE2362	t1547		zyg-8	yes		Gönczy P, Bellanger JM, Kirkham M, Pozniakowski A, Baumer K, Phillips JB, Hyman AA. zyg-8, a gene required for spindle positioning in C. elegans, encodes a doublecortin-related kinase that promotes microtubule assembly. Developmental cell. 2001 Sep 1;1(3):363-75.	sequenced in Gonczy 2001 but no sequence info in WormBase
gene-33	GE1718	t1441		zyg-8	yes		Gönczy P, Bellanger JM, Kirkham M, Pozniakowski A, Baumer K, Phillips JB, Hyman AA. zyg-8, a gene required for spindle positioning in C. elegans, encodes a doublecortin-related kinase that promotes microtubule assembly. Developmental cell. 2001 Sep 1;1(3):363-75.
gene-33	GE2533	t1638		zyg-8	yes		Gönczy P, Bellanger JM, Kirkham M, Pozniakowski A, Baumer K, Phillips JB, Hyman AA. zyg-8, a gene required for spindle positioning in C. elegans, encodes a doublecortin-related kinase that promotes microtubule assembly. Developmental cell. 2001 Sep 1;1(3):363-75.	sequenced in Gonczy 2001 but no sequence info in WormBase; our deletion coordinates from WGS show a slightly different deletion than the one in Gonczy 2001
gene-15	GE2220	t1516		top-3	no
gene-15	GE2399	t1559		top-3	no
gene-17	GE2206	t1514		bckd-1A	no
gene-17	GE2627	t1603		bckd-1A	no	(gene 17)	Gönczy, P., H. Schnabel, T. Kaletta, A. D. Amores, T. Hyman et al., 1999 Dissection of cell division processes in the one cell stage Caenorhabditis elegans embryo by mutational analysis. J. Cell Biol. 144: 927-946.	not sequenced, but in Gonczy 1999 without a gene name (not on physical map)
gene-18	GE2211	t1476		sas-1	yes		von Tobel, L., Mikeladze-Dvali, T., Delattre, M., Balestra, F.R., Blanchoud, S., Finger, S., Knott, G., Müller-Reichert, T. and Gönczy, P., 2014. SAS-1 is a C2 domain protein critical for centriole integrity in C. elegans. PLoS genetics, 10(11), p.e1004777.	ID'd in Gonczy 1999; sequenced in von Tobel 2014 but no sequence info on WormBase
gene-18	GE2343	t1521		sas-1	yes		von Tobel, L., Mikeladze-Dvali, T., Delattre, M., Balestra, F.R., Blanchoud, S., Finger, S., Knott, G., Müller-Reichert, T. and Gönczy, P., 2014. SAS-1 is a C2 domain protein critical for centriole integrity in C. elegans. PLoS genetics, 10(11), p.e1004777.	ID'd in Gonczy 1999; sequenced in von Tobel 2014 but no sequence info on WormBase
gene-19	GE2590	t1657		(none)	no
gene-19	GE2611	t1675		(none)	no	(gene 19)	Gönczy, P., H. Schnabel, T. Kaletta, A. D. Amores, T. Hyman et al., 1999 Dissection of cell division processes in the one cell stage Caenorhabditis elegans embryo by mutational analysis. J. Cell Biol. 144: 927-946.	not sequenced, but in Gonczy 1999 without a gene name (not on physical map)
gene-20	GE2579	t1644		(cul-2)	yes		Sonneville R, Gönczy P. Zyg-11 and cul-2 regulate progression through meiosis II and polarity establishment in C. elegans. Development. 2004 Aug 1;131(15):3527-43.	in Sonneville 2004 but not caught by our filtering
gene-20	GE2597	t1664		(cul-2)	yes		Sonneville R, Gönczy P. Zyg-11 and cul-2 regulate progression through meiosis II and polarity establishment in C. elegans. Development. 2004 Aug 1;131(15):3527-43.	in Sonneville 2004 but not caught by our filtering
gene-21	GE2237	t1614		pod-1	no	(gene 21)	Gönczy, P., H. Schnabel, T. Kaletta, A. D. Amores, T. Hyman et al., 1999 Dissection of cell division processes in the one cell stage Caenorhabditis elegans embryo by mutational analysis. J. Cell Biol. 144: 927-946.
gene-21	GE2605	t1674		pod-1	no	(gene 21)	Gönczy, P., H. Schnabel, T. Kaletta, A. D. Amores, T. Hyman et al., 1999 Dissection of cell division processes in the one cell stage Caenorhabditis elegans embryo by mutational analysis. J. Cell Biol. 144: 927-946.
gene-22	GE2653	t1698		lis-1	yes		Cockell MM, Baumer K, Gönczy P. lis-1 is required for dynein-dependent cell division processes in C. elegans embryos. Journal of cell science. 2004 Sep 1;117(19):4571-82.	ID'd in Gonczy 1999; sequenced in Cockell 2004
gene-22	GE2730	t1550		lis-1	yes		Cockell MM, Baumer K, Gönczy P. lis-1 is required for dynein-dependent cell division processes in C. elegans embryos. Journal of cell science. 2004 Sep 1;117(19):4571-82.	ID'd in Gonczy 1999; sequenced in Cockell 2004
gene-23	GE1713	t1433		ZK688.9	no	csg-2	Gönczy, P., H. Schnabel, T. Kaletta, A. D. Amores, T. Hyman et al., 1999 Dissection of cell division processes in the one cell stage Caenorhabditis elegans embryo by mutational analysis. J. Cell Biol. 144: 927-946.	not sequenced, but in Gonczy 1999 under a different gene name (not on physical map)
gene-23	GE2621	t1587		ZK688.9	no	csg-2	Gönczy, P., H. Schnabel, T. Kaletta, A. D. Amores, T. Hyman et al., 1999 Dissection of cell division processes in the one cell stage Caenorhabditis elegans embryo by mutational analysis. J. Cell Biol. 144: 927-946.	not sequenced, but in Gonczy 1999 under a different gene name (not on physical map)
gene-24	GE2242	t1618		cra-1	no	cta-1	Gönczy, P., H. Schnabel, T. Kaletta, A. D. Amores, T. Hyman et al., 1999 Dissection of cell division processes in the one cell stage Caenorhabditis elegans embryo by mutational analysis. J. Cell Biol. 144: 927-946.	not sequenced, but in Gonczy 1999 under a different gene name (not on physical map)
gene-24	GE2657	t1704		cra-1	no	cta-1	Gönczy, P., H. Schnabel, T. Kaletta, A. D. Amores, T. Hyman et al., 1999 Dissection of cell division processes in the one cell stage Caenorhabditis elegans embryo by mutational analysis. J. Cell Biol. 144: 927-946.	not sequenced, but in Gonczy 1999 under a different gene name (not on physical map)
gene-25	GE2355	t1528		cup-5	no			another allele from gene-25 in Gonczy 1999
gene-25	GE2595	t1662	t1718	cup-5	no			another allele from gene-25 in Gonczy 1999
gene-26	GE1715	t1436		gsp-2	no			two other alleles from gene-26 in Gonczy 1999
gene-26	GE2360	t1481		gsp-2	no			two other alleles from gene-26 in Gonczy 1999
gene-27	GE1722	t1435		vps-33.1	no			another allele from gene-27 in Gonczy 1999
gene-27	GE2366	t1561		vps-33.1	no			another allele from gene-27 in Gonczy 1999
gene-28	GE2200	t1480		bckd-1A	no
gene-28	GE1742	t1461		bckd-1A	no	(gene 28)	Gönczy, P., H. Schnabel, T. Kaletta, A. D. Amores, T. Hyman et al., 1999 Dissection of cell division processes in the one cell stage Caenorhabditis elegans embryo by mutational analysis. J. Cell Biol. 144: 927-946.	not sequenced, but in Gonczy 1999 without a gene name (not on physical map)
gene-29	GE1720	t1446		(none)	no	emb-30 but later reported as misassigned	Gönczy, P., H. Schnabel, T. Kaletta, A. D. Amores, T. Hyman et al., 1999 Dissection of cell division processes in the one cell stage Caenorhabditis elegans embryo by mutational analysis. J. Cell Biol. 144: 927-946.	not sequenced, but in Gonczy 1999 under a different gene name (not on physical map); said to be misassigned as emb-30 in Furuta 2000
gene-29	GE2646	t1600		(none)	no	emb-30 but later reported as misassigned	Gönczy, P., H. Schnabel, T. Kaletta, A. D. Amores, T. Hyman et al., 1999 Dissection of cell division processes in the one cell stage Caenorhabditis elegans embryo by mutational analysis. J. Cell Biol. 144: 927-946.	not sequenced, but in Gonczy 1999 under a different gene name (not on physical map); said to be misassigned as emb-30 in Furuta 2000
gene-30	GE2345	t1525		cyk-3	yes		Kaitna S, Schnabel H, Schnabel R, Hyman AA, Glotzer M. A ubiquitin C-terminal hydrolase is required to maintain osmotic balance and execute actin-dependent processes in the early C. elegans embryo. Journal of cell science. 2002 Jun 1;115(11):2293-302.	ID'd in Gonczy 1999; sequenced in Kaitna 2002
gene-30	GE2352	t1535		cyk-3	yes		Kaitna S, Schnabel H, Schnabel R, Hyman AA, Glotzer M. A ubiquitin C-terminal hydrolase is required to maintain osmotic balance and execute actin-dependent processes in the early C. elegans embryo. Journal of cell science. 2002 Jun 1;115(11):2293-302.	ID'd in Gonczy 1999; sequenced in Kaitna 2002
gene-31	GE2583	t1654		hcp-3	no
gene-31	GE2692	t1717		hcp-3	no	(gene 31)	Gönczy, P., H. Schnabel, T. Kaletta, A. D. Amores, T. Hyman et al., 1999 Dissection of cell division processes in the one cell stage Caenorhabditis elegans embryo by mutational analysis. J. Cell Biol. 144: 927-946.	not sequenced, but in Gonczy 1999 without a gene name (not on physical map)
gene-32	GE2545	t1577		gsr-1	no
gene-32	GE2644	t1594		gsr-1	no
gene-34	GE1745	t1464		(none)	no
gene-34	GE2278	t1502		(none)	no	mod-5 (dmo-5) (gene 34)	Gönczy, P., H. Schnabel, T. Kaletta, A. D. Amores, T. Hyman et al., 1999 Dissection of cell division processes in the one cell stage Caenorhabditis elegans embryo by mutational analysis. J. Cell Biol. 144: 927-946. Molin, L., Schnabel, H., Kaletta, T., Feichtinger, R., Hope, I.A. and Schnabel, R., 1999. Complexity of developmental control: analysis of embryonic cell lineage specification in Caeno…	not sequenced, but in Gonczy 1999 AND Molin 1999 (not on physical map)
gene-35	GE2958	t1464	t1484	top-3 (+ unknown gene)	no
gene-35	GE1735	t1470		top-3 (+ unknown gene)	no	(gene 35)	Gönczy, P., H. Schnabel, T. Kaletta, A. D. Amores, T. Hyman et al., 1999 Dissection of cell division processes in the one cell stage Caenorhabditis elegans embryo by mutational analysis. J. Cell Biol. 144: 927-946.	not sequenced, but in Gonczy 1999 without a gene name (not on physical map)
gene-4	GE2357	t1527		cls-2	no
gene-4	GE2275	t1517		cls-2	no	(gene 04)	Gönczy, P., H. Schnabel, T. Kaletta, A. D. Amores, T. Hyman et al., 1999 Dissection of cell division processes in the one cell stage Caenorhabditis elegans embryo by mutational analysis. J. Cell Biol. 144: 927-946.	not sequenced, but in Gonczy 1999 without a gene name (not on physical map)
gene-40	GE2596	t1663		(none)	no	mod-4 (cta-2)	Molin, L., Schnabel, H., Kaletta, T., Feichtinger, R., Hope, I.A. and Schnabel, R., 1999. Complexity of developmental control: analysis of embryonic cell lineage specification in Caenorhabditis elegans using pes-1 as an early marker. Genetics, 151(1), pp.131-141.	not sequenced, but in Molin 1999 with a different gene name (not on physical map)
gene-40	GE2656	t1701		(none)	no	mod-4 (cta-2)	Molin, L., Schnabel, H., Kaletta, T., Feichtinger, R., Hope, I.A. and Schnabel, R., 1999. Complexity of developmental control: analysis of embryonic cell lineage specification in Caenorhabditis elegans using pes-1 as an early marker. Genetics, 151(1), pp.131-141.	not sequenced, but in Gonczy 1999 AND Molin 1999 with a different gene name (not on physical map)
gene-41	GE2207	t1539	t1541	(none)	no	sas-2	Gönczy, P., H. Schnabel, T. Kaletta, A. D. Amores, T. Hyman et al., 1999 Dissection of cell division processes in the one cell stage Caenorhabditis elegans embryo by mutational analysis. J. Cell Biol. 144: 927-946.	not sequenced, but in Gonczy 1999 under a different gene name (not on physical map)
gene-41	GE2629	t1595		(none)	no	sas-2	Gönczy, P., H. Schnabel, T. Kaletta, A. D. Amores, T. Hyman et al., 1999 Dissection of cell division processes in the one cell stage Caenorhabditis elegans embryo by mutational analysis. J. Cell Biol. 144: 927-946.	not sequenced, but in Gonczy 1999 under a different gene name (not on physical map)
gene-43	GE1744	t1463 (alleged double mutant with gene-11)		(none)	no	csg-1	Gönczy, P., H. Schnabel, T. Kaletta, A. D. Amores, T. Hyman et al., 1999 Dissection of cell division processes in the one cell stage Caenorhabditis elegans embryo by mutational analysis. J. Cell Biol. 144: 927-946.	not sequenced, but in Gonczy 1999 under a different gene name (not on physical map); said to be allelic with t1501 and t1519 but common gene hits not found in our study
gene-5	GE2277	t1496		such-1	no
gene-5	GE2666	t1693		such-1	no
gene-6	GE2367	t1563		klp-19	no			two other alleles from gene-06 in Gonczy 1999
gene-6	GE2264	t1628		klp-19	no	mod-3 (dmo-3)	Molin, L., Schnabel, H., Kaletta, T., Feichtinger, R., Hope, I.A. and Schnabel, R., 1999. Complexity of developmental control: analysis of embryonic cell lineage specification in Caenorhabditis elegans using pes-1 as an early marker. Genetics, 151(1), pp.	not sequenced, but in Molin 1999 under a different gene name (not on physical map); two other alleles from gene-06 in Gonczy 1999
gene-8	GE1725	t1437		(none)	no
gene-8	GE2359	t1478		(none)	no	arm-5 (amo-5)	Molin, L., Schnabel, H., Kaletta, T., Feichtinger, R., Hope, I.A. and Schnabel, R., 1999. Complexity of developmental control: analysis of embryonic cell lineage specification in Caenorhabditis elegans using pes-1 as an early marker. Genetics, 151(1), pp.	not sequenced, but in Molin 1999 under a different gene name (not on physical map)
a	GE2826	t2052		(C56A3.8)	no			no variants in C56A3.8 found in this strain
a	GE2734	t2029		C56A3.8	no
a	GE2487	t2149		C56A3.8	no
a	GE2886	t2055		C56A3.8	no
A	GE1938	t1742		cpt-2	no
A	GE2447	t1879		cpt-2	no
b	GE2122	t2007		cept-2	no
b	GE2047	t2021		cept-2	no
C	GE1932	t1732		dif-1	no
C	GE2028	t1801		dif-1	no
c	GE2112	t2037		unc-112	no
c	GE2326	t2106		unc-112	no
D	GE1929	t1729		csr-1	no
D	GE2452	t1897		csr-1	no
d	GE2335	t2056		dlat-1	no
d	GE2541	t2035		dlat-1	no
e	GE2086	t2093		(none)	no
e	GE2733	t2008		(none)	no
E	GE2189	t1750		rad-51	no
E	GE2433	1885		rad-51	no		see comment	some phenotype information in this German dissertation: https://publikationsserver.tu-braunschweig.de/servlets/MCRFileNodeServlet/dbbs_derivate_00004175/dr_arbeit.pdf
F	GE2391	t1932		perm-5	no
F	GE2453	t1900		perm-5	no
f	GE2078	t2033		sas-5	yes		Delattre M, Leidel S, Wani K, Baumer K, Bamat J, Schnabel H, Feichtinger R, Schnabel R, Gönczy P. Centriolar SAS-5 is required for centrosome duplication in C. elegans. Nature cell biology. 2004 Jul;6(7):656-64.	sequenced in Delattre 2004
f	GE2134	t2079		sas-5	yes		Delattre M, Leidel S, Wani K, Baumer K, Bamat J, Schnabel H, Feichtinger R, Schnabel R, Gönczy P. Centriolar SAS-5 is required for centrosome duplication in C. elegans. Nature cell biology. 2004 Jul;6(7):656-64.	sequenced in Delattre 2004
G	GE2000	t1795		klp-18	no
G	GE2455	t1914		klp-18	no
g	GE2059	t2025		sqv-4	no
g	GE2386	t2165		sqv-4	no
H	GE1936	t1738		atg-7	no
H	GE1958	t1726		atg-7	no
I	GE2003	t1817		let-99	no
I	GE2514	t1912		let-99	no
J	GE2407	t1906		D2096.12	no
J	GE2499	t1877		D2096.12	no
L	GE1939	t1745		trcs-1	no
L	GE2512	t1909		trcs-1	no
M	GE1999	t1793		mex-5	no
M	GE2093	t1800		mex-5	no
N	GE2153	t1773		wapl-1	no
N	GE2305	t1867		wapl-1	no
o	GE2077	t1757		(none)	no
o	GE2526	t1937		(none)	no
O	GE2063	t2042		dgtr-1	no
O	GE2135	t2043		dgtr-1	no
P	GE2317	t2098		spn-4	no
P	GE2469	t2173		spn-4	no
p	GE2884	t1755		Y54G2A.73	no
p	GE2387	t1913		Y54G2A.73	no
p	GE2738	t1833		Y54G2A.73	no
p	GE2551	t1792		Y54G2A.73	no			only an intronic mutation found in this strain
q	GE2827	t1786		T22B11.1	no
q	GE2895	t1866		T22B11.1	no
Q	GE1937	t2189		vps-39	no
Q	GE2292	t2114		vps-39	no
Q	GE2056	t2016		vps-39	no
Q	GE2046	t2015		(vps-39)	no			no SNVs/indels found in vps-39 in this strain, but there may be a large rearrangement in the region
r	GE2379	t1886		(none)	no
r	GE2836	t1780		(none)	no
R	GE2082	t2053		cpl-1	no
R	GE2451	t2144		cpl-1	no			(shows up on Google but looks like a typo in the article that should say e2144)
s	GE2373	t1811		(none)	no
s	GE2824	t1758		(none)	no
S	GE2511	t2162		mom-2	no
S	GE2523	t2180		mom-2	no		Bischoff M, Schnabel R. A posterior centre establishes and maintains polarity of the Caenorhabditis elegans embryo by a Wnt-dependent relay mechanism. PLoS Biol. 2006 Nov 21;4(12):e396. Langenhan, T., Prömel, S., Mestek, L., Esmaeili, B., Waller-Evans, H., Hennig, C., Kohara, Y., Avery, L., Vakonakis, I., Schnabel, R. and Russ, A.P., 2009. Latrophilin signaling links anterior-posterior tissue pol…	Mentioned as a mom-2 allele in Bischoff 2006 and Langenhan 2009 but no sequence
T	GE2449	t2143		atl-1	no
T	GE2467	t2155		atl-1	no
t	GE2837	t1791		F56D5.2	no
t	GE2881	t1744		F56D5.2	no
u	GE2402	t1940		F21D5.1	no
u	GE2445	t1935		F21D5.1	no
U	GE2393	t2183		(pos-1)	no			no SNVs/indels found in pos-1 in this strain, but there may be a large deletion in the promoter region
U	GE3129	t2181		(pos-1)	no			no variants in pos-1 in this strain
U	GE3128	t2177		pos-1	no
U	GE2101	t2080		pos-1	no
V	GE2142	t2074		ccz-1	no
V	GE2304	t2129		ccz-1	yes		Nieto C, Almendinger J, Gysi S, Gómez-Orte E, Kaech A, Hengartner MO, Schnabel R, Moreno S, Cabello J. ccz-1 mediates the digestion of apoptotic corpses in C. elegans. Journal of cell science. 2010 Jun 15;123(12):2001-7.
v	GE2091	t1772		nstp-2	no
v	GE2288	t1835		nstp-2	no
vz	GE2840	t1860		C34D4.4	no
vz	GE2890	t1821		C34D4.4	no
w	GE1998	t1790		(none)	no
w	GE2442	t1920		(none)	no
W	GE2103	t2092		mre-11	no
W	GE2497	t2137		mre-11	no
x	GE2289	t1836		aptf-2	no
x	GE2314	t1724		aptf-2	no
Y	GE2337	t2095		air-1	no
Y	GE2430	t2135		air-1	no
z	GE2130	t1765		mbk-2	no
z	GE2503	t1888		mbk-2	no
Z	GE2476	t2147		rad-50	no
Z	GE2517	t2175		rad-50	no

## Sheet: CommonGeneHits(cod+noncoding)
Complementation Group	Mapped Under	Variant within Hard Limits of Mapped Region	Variant within Soft Limits of Mapped Region	Strain	Allele(s)	Het/Homo DNA Input	Het/Homo Variant Called	Chromosome	Position	Base Change		Mutation Type	Feature Affected	Locus	Gene Name	Mutation Type	Amino Acid Change
Z	ctDf1	FALSE	FALSE	GE2476	t2147	het	het	V	10011889	C	T	SNV	UTR	K08H10.1	lea-1
Z	ctDf1	FALSE	FALSE	GE2517	t2175	het	het	V	10026014	T	A	SNV	intron	K08H10.1	lea-1
Z	ctDf1	TRUE	TRUE	GE2517	t2175	het	het	V	12247914	T	A	SNV	coding_exon	T04H1.4	rad-50	nonsense	L->*
Z	ctDf1	TRUE	TRUE	GE2476	t2147	het	het	V	12250324	T	A	SNV	coding_exon	T04H1.4	rad-50	missense	I->N
J	eDf19	FALSE	FALSE	GE2407	t1906	het	hom	IV	920320	G	A	SNV	coding_exon	F58H7.5	F58H7.5	missense	E->K
J	eDf19	FALSE	FALSE	GE2499	t1877	het	hom	IV	920320	G	A	SNV	coding_exon	F58H7.5	F58H7.5	missense	E->K
J	eDf19	FALSE	FALSE	GE2407	t1906	het	het	IV	3646348	C	T	SNV	intron	CC8.2	CC8.2
J	eDf19	FALSE	FALSE	GE2499	t1877	het	het	IV	3647290	A	T	SNV	intron	CC8.2	CC8.2
J	eDf19	TRUE	FALSE	GE2499	t1877	het	het	IV	8363937	C	T	SNV	coding_exon	D2096.12	D2096.12	nonsense	Q->*
J	eDf19	TRUE	FALSE	GE2407	t1906	het	het	IV	8365654	T	A	SNV	coding_exon	D2096.12	D2096.12	nonsense	L->*
J	eDf19	FALSE	FALSE	GE2499	t1877	het	het	IV	11343518	A	G	SNV	coding_exon	T01G1.1	klp-12	missense	F->S
J	eDf19	FALSE	FALSE	GE2407	t1906	het	het	IV	11354833	C	T	SNV	intron	T01G1.1	klp-12
J	eDf19	FALSE	FALSE	GE2407	t1906	het	het	IV	11354834	C	T	SNV	intron	T01G1.1	klp-12
J	eDf19	FALSE	FALSE	GE2407	t1906	het	het	IV	12669655	C	T	SNV	intron	C26H9A.2	wdfy-3
J	eDf19	FALSE	FALSE	GE2499	t1877	het	het	IV	12673728	A	G	SNV	intron	C26H9A.2	wdfy-3
L	eDf19	FALSE	FALSE	GE2512	t1909	homo	hom	IV	2359900	T	A	SNV	intron	Y38F2AR.5	tftc-1
L	eDf19	FALSE	FALSE	GE1939	t1745	homo	hom	IV	2373078	T	A	SNV	intron	Y38F2AR.5	tftc-1
L	eDf19	FALSE	FALSE	GE1939	t1745	homo	hom	IV	7405740	ATTTTTTTTTTTT	ATTTTTTTTTTT	deletion	intron	C48A7.1	egl-19
L	eDf19	FALSE	FALSE	GE2512	t1909	homo	hom	IV	7405740	ATTTTTTTTTTTT	ATTTTTTTTTTT	deletion	intron	C48A7.1	egl-19
L	eDf19	TRUE	TRUE	GE2512	t1909	homo	hom	IV	9587541	C	T	SNV	coding_exon	F27C8.6	trcs-1	missense	E->K
L	eDf19	TRUE	TRUE	GE1939	t1745	homo	hom	IV	9587985	G	A	SNV	coding_exon	F27C8.6	trcs-1	nonsense	Q->*
L	eDf19	FALSE	FALSE	GE2512	t1909	homo	hom	IV	11139519	G	C	SNV	coding_exon	F01G4.3	skih-2	missense	A->G
L	eDf19	FALSE	FALSE	GE1939	t1745	homo	hom	IV	11142118	G	A	SNV	coding_exon	F01G4.3	skih-2	synonymous	I->I
L	eDf19	FALSE	FALSE	GE1939	t1745	homo	hom	IV	13989868	G	A	SNV	intron	Y37A1B.11	egl-23
L	eDf19	FALSE	FALSE	GE2512	t1909	homo	het	IV	14010160	A	G	SNV	intron	Y37A1B.11	egl-23
t	eDf19	FALSE	FALSE	GE2881	t1744	het	het	IV	1913733	G	A	SNV	coding_exon	F55A8.1	egl-18	missense	V->I
t	eDf19	FALSE	FALSE	GE2837	t1791	het	het	IV	1914099	G	A	SNV	coding_exon	F55A8.1	egl-18	missense	D->N
t	eDf19	FALSE	FALSE	GE2837	t1791	het	het	IV	3044704	C	T	SNV	coding_exon	Y67D8C.5	eel-1	missense	G->E
t	eDf19	FALSE	FALSE	GE2837	t1791	het	het	IV	3045185	G	A	SNV	coding_exon	Y67D8C.5	eel-1	nonsense	Q->*
t	eDf19	FALSE	FALSE	GE2881	t1744	het	het	IV	3045188	C	T	SNV	coding_exon	Y67D8C.5	eel-1	missense	E->K
t	eDf19	FALSE	FALSE	GE2837	t1791	het	het	IV	3241183	G	A	SNV	intron	Y67D8A.2	Y67D8A.2
t	eDf19	FALSE	FALSE	GE2881	t1744	het	het	IV	3250739	G	A	SNV	intron	Y67D8A.2	Y67D8A.2
t	eDf19	FALSE	FALSE	GE2837	t1791	het	het	IV	4254059	C	A	SNV	intron	F36A4.7	ama-1
t	eDf19	FALSE	FALSE	GE2881	t1744	het	het	IV	4254059	C	A	SNV	intron	F36A4.7	ama-1
t	eDf19	TRUE	TRUE	GE2837	t1791	het	het	IV	9397791	G	A	SNV	coding_exon	F56D5.2	F56D5.2	nonsense	Q->*
t	eDf19	TRUE	TRUE	GE2881	t1744	het	het	IV	9398158	G	A	SNV	coding_exon	F56D5.2	F56D5.2	missense	S->F
t	eDf19	FALSE	FALSE	GE2837	t1791	het	het	IV	11054758	C	T	SNV	intron	F36H1.4	lin-3
t	eDf19	FALSE	FALSE	GE2881	t1744	het	het	IV	11054758	C	T	SNV	intron	F36H1.4	lin-3
u	eDf19	FALSE	FALSE	GE2402	t1940	het	het	IV	1926552	G	A	SNV	intron	F52C12.4	denn-4
u	eDf19	FALSE	FALSE	GE2402	t1940	het	het	IV	1937511	T	A	SNV	intron	F52C12.4	denn-4
u	eDf19	FALSE	FALSE	GE2445	t1935	het	het	IV	1939680	C	T	SNV	intron	F52C12.4	denn-4
u	eDf19	TRUE	TRUE	GE2402	t1940	het	het	IV	8727315	C	T	SNV	coding_exon	F21D5.1	F21D5.1	missense	A->V
u	eDf19	TRUE	TRUE	GE2445	t1935	het	het	IV	8727668	C	T	SNV	coding_exon	F21D5.1	F21D5.1	missense	L->F
b	itDf2	FALSE	FALSE	GE2122	t2007	het	het	V	7020194	C	T	SNV	intron	F20A1.4	F20A1.4
b	itDf2	FALSE	FALSE	GE2047	t2021	het	het	V	7020487	G	A	SNV	intron	F20A1.4	F20A1.4
b	itDf2	TRUE	FALSE	GE2047	t2021	het	het	V	14349388	G	A	SNV	coding_exon	Y49A3A.1	cept-2	nonsense	W->*
b	itDf2	TRUE	FALSE	GE2122	t2007	het	het	V	14349747	G	A	SNV	intron	Y49A3A.1	cept-2	splicing
d	itDf2	FALSE	FALSE	GE2335	t2056	het	het	V	9589262	G	A	SNV	coding_exon	K09G1.1	K09G1.1	synonymous	K->K
d	itDf2	FALSE	FALSE	GE2541	t2035	het	het	V	9589262	G	A	SNV	coding_exon	K09G1.1	K09G1.1	synonymous	K->K
d	itDf2	FALSE	FALSE	GE2335	t2056	het	het	V	9655696	G	A	SNV	intron	B0331.1	cyp-29A4
d	itDf2	FALSE	FALSE	GE2541	t2035	het	het	V	9655696	G	A	SNV	intron	B0331.1	cyp-29A4
d	itDf2	FALSE	FALSE	GE2335	t2056	het	het	V	12420692	G	A	SNV	coding_exon	C54D10.4	C54D10.4	missense	L->F
d	itDf2	FALSE	FALSE	GE2541	t2035	het	het	V	12420692	G	A	SNV	coding_exon	C54D10.4	C54D10.4	missense	L->F
d	itDf2	TRUE	TRUE	GE2335	t2056	het	het	V	14445907	G	A	SNV	coding_exon	F23B12.5	dlat-1	nonsense	Q->*
d	itDf2	TRUE	TRUE	GE2541	t2035	het	het	V	14446981	G	A	SNV	coding_exon	F23B12.5	dlat-1	missense	P->L
Q_pair2	itDf2	FALSE	FALSE	GE2056	t2016	het	het	V	6470663	G	A	SNV	intron	W01A11.3	unc-83
Q_pair2	itDf2	FALSE	FALSE	GE1937	t2189	het	het	V	6486037	T	G	SNV	coding_exon	W01A11.3	unc-83	missense	F->C
Q_pair2	itDf2	FALSE	FALSE	GE2056	t2016	het	het	V	11774122	C	T	SNV	intron	F55A11.5	bus-18
Q_pair2	itDf2	FALSE	FALSE	GE1937	t2189	het	het	V	11774282	C	T	SNV	intron	F55A11.5	bus-18
Q_pair2	itDf2	TRUE	FALSE	GE1937	t2189	het	het	V	14036143	C	T	SNV	coding_exon	T08G5.5	vps-39	nonsense	W->*
Q_pair2	itDf2	TRUE	FALSE	GE2056	t2016	het	het	V	14037839	G	C	SNV	coding_exon	T08G5.5	vps-39	nonsense	Y->*
Q_pair2	itDf2	TRUE	FALSE	GE2056	t2016	het	het	V	16755954	A	T	SNV	intron	T25E12.4	dkf-2
Q_pair2	itDf2	TRUE	FALSE	GE1937	t2189	het	het	V	16777721	C	T	SNV	intron	T25E12.4	dkf-2
Q_pair3	itDf2	FALSE	FALSE	GE1937	t2189	het	het	V	11850156	C	T	SNV	intron	R13H4.4	hmp-1
Q_pair3	itDf2	FALSE	FALSE	GE2292	t2114	het	het	V	11851896	G	A	SNV	UTR	R13H4.4	hmp-1
Q_pair3	itDf2	TRUE	FALSE	GE2292	t2114	het	het	V	14035713	G	A	SNV	coding_exon	T08G5.5	vps-39	nonsense	Q->*
Q_pair3	itDf2	TRUE	FALSE	GE1937	t2189	het	het	V	14036143	C	T	SNV	coding_exon	T08G5.5	vps-39	nonsense	W->*
Q_pair4	itDf2	FALSE	FALSE	GE2046	t2015	het	het	V	36824	G	A	SNV	coding_exon	B0348.4	egl-8	synonymous	V->V
Q_pair4	itDf2	FALSE	FALSE	GE2056	t2016	het	het	V	42273	G	A	SNV	coding_exon	B0348.4	egl-8	synonymous	K->K
Q_pair4	itDf2	FALSE	FALSE	GE2046	t2015	het	het	V	4927401	T	A	SNV	coding_exon	C02E7.2	srh-21	missense	D->E
Q_pair4	itDf2	FALSE	FALSE	GE2056	t2016	het	het	V	4927401	T	A	SNV	coding_exon	C02E7.2	srh-21	missense	D->E
Q_pair5	itDf2	FALSE	FALSE	GE2292	t2114	het	het	V	26804	G	A	SNV	intron	B0348.4	egl-8
Q_pair5	itDf2	FALSE	FALSE	GE2292	t2114	het	het	V	32803	G	A	SNV	intron	B0348.4	egl-8
Q_pair5	itDf2	FALSE	FALSE	GE2046	t2015	het	het	V	36824	G	A	SNV	coding_exon	B0348.4	egl-8	synonymous	V->V
Q_pair5	itDf2	FALSE	FALSE	GE2046	t2015	het	het	V	7829063	G	A	SNV	coding_exon	C37C3.6	mig-6	missense	G->R
Q_pair5	itDf2	FALSE	FALSE	GE2292	t2114	het	het	V	7836114	A	G	SNV	intron	C37C3.6	mig-6
Q_pair6	itDf2	FALSE	FALSE	GE2292	t2114	het	het	V	26804	G	A	SNV	intron	B0348.4	egl-8
Q_pair6	itDf2	FALSE	FALSE	GE2292	t2114	het	het	V	32803	G	A	SNV	intron	B0348.4	egl-8
Q_pair6	itDf2	FALSE	FALSE	GE2056	t2016	het	het	V	42273	G	A	SNV	coding_exon	B0348.4	egl-8	synonymous	K->K
Q_pair6	itDf2	FALSE	FALSE	GE2292	t2114	het	het	V	8207279	C	T	SNV	coding_exon	K07C11.3	K07C11.3	missense	P->L
Q_pair6	itDf2	FALSE	FALSE	GE2056	t2016	het	het	V	8207297	G	A	SNV	coding_exon	K07C11.3	K07C11.3	missense	C->Y
Q_pair6	itDf2	FALSE	FALSE	GE2056	t2016	het	het	V	13421205	C	T	SNV	coding_exon	F53F1.8	srv-9	missense	G->S
Q_pair6	itDf2	FALSE	FALSE	GE2292	t2114	het	het	V	13421306	G	A	SNV	coding_exon	F53F1.8	srv-9	synonymous	I->I
Q_pair6	itDf2	TRUE	FALSE	GE2292	t2114	het	het	V	14035713	G	A	SNV	coding_exon	T08G5.5	vps-39	nonsense	Q->*
Q_pair6	itDf2	TRUE	FALSE	GE2056	t2016	het	het	V	14037839	G	C	SNV	coding_exon	T08G5.5	vps-39	nonsense	Y->*
R	itDf2	FALSE	FALSE	GE2451	t2144	het	het	V	1795990	G	A	SNV	intron	F36H9.1	F36H9.1
R	itDf2	FALSE	FALSE	GE2082	t2053	het	het	V	1796270	G	A	SNV	intron	F36H9.1	F36H9.1
R	itDf2	TRUE	FALSE	GE2082	t2053	het	het	V	13692642	G	A	SNV	UTR	T01D3.1	T01D3.1
R	itDf2	TRUE	FALSE	GE2451	t2144	het	het	V	13700597	C	T	SNV	coding_exon	T01D3.1	T01D3.1	missense	P->S
R	itDf2	TRUE	FALSE	GE2082	t2053	het	het	V	16593886	G	A	SNV	coding_exon	T03E6.7	cpl-1	missense	S->F
R	itDf2	TRUE	FALSE	GE2451	t2144	het	het	V	16595201	G	A	SNV	coding_exon	T03E6.7	cpl-1	nonsense	Q->*
gene-23	nDf16	TRUE	TRUE	GE1713	t1433	het	het	III	7882477	C	T	SNV	coding_exon	ZK688.9	ZK688.9	nonsense	W->*
gene-23	nDf16	TRUE	TRUE	GE2621	t1587	het	het	III	7882717	C	T	SNV	intron	ZK688.9	ZK688.9	splicing
gene-23	nDf16	FALSE	FALSE	GE2621	t1587	het	het	III	11927051	C	T	SNV	coding_exon	Y56A3A.13	nft-1	missense	S->F
gene-23	nDf16	FALSE	FALSE	GE1713	t1433	het	het	III	11928973	G	A	SNV	coding_exon	Y56A3A.13	nft-1	missense	V->I
gene-24	nDf16	TRUE	FALSE	GE2657	t1704	het	het	III	6636326	G	A	SNV	intron	C13B9.4	pdfr-1
gene-24	nDf16	TRUE	FALSE	GE2242	t1618	het	het	III	6638524	C	T	SNV	coding_exon	C13B9.4	pdfr-1	missense	E->K
gene-24	nDf16	TRUE	TRUE	GE2657	t1704	het	hom	III	6867181	G	A	SNV	coding_exon	R13F6.10	cra-1	nonsense	Q->*
gene-24	nDf16	TRUE	TRUE	GE2242	t1618	het	het	III	6868737	C	T	SNV	coding_exon	R13F6.10	cra-1	nonsense	W->*
gene-24	nDf16	FALSE	FALSE	GE2657	t1704	het	het	III	12284840	G	A	SNV	intron	Y75B8A.26	mrp-8
gene-24	nDf16	FALSE	FALSE	GE2242	t1618	het	het	III	12290439	G	A	SNV	intron	Y75B8A.26	mrp-8
gene-25	nDf16	FALSE	FALSE	GE2355	t1528	het	het	III	1449638	C	T	SNV	intron	Y82E9BR.17	Y82E9BR.17
gene-25	nDf16	FALSE	FALSE	GE2595	t1662 t1718	het	het	III	1452829	T	A	SNV	intron	Y82E9BR.17	Y82E9BR.17
gene-25	nDf16	FALSE	FALSE	GE2355	t1528	het	het	III	2708871	C	T	SNV	intron	Y71H2AM.10	Y71H2AM.10
gene-25	nDf16	FALSE	FALSE	GE2595	t1662 t1718	het	het	III	2715995	T	A	SNV	intron	Y71H2AM.10	Y71H2AM.10
gene-25	nDf16	FALSE	FALSE	GE2595	t1662 t1718	het	het	III	4131042	C	T	SNV	intron	C30D11.1	unc-103
gene-25	nDf16	FALSE	FALSE	GE2355	t1528	het	het	III	4134389	C	T	SNV	coding_exon	C30D11.1	unc-103	missense	P->S
gene-25	nDf16	TRUE	TRUE	GE2595	t1662 t1718	het	het	III	7585568	C	T	SNV	coding_exon	R13A5.1	cup-5	nonsense	R->*
gene-25	nDf16	TRUE	TRUE	GE2355	t1528	het	het	III	7590536	G	A	SNV	intron	R13A5.1	cup-5	splicing
gene-25	nDf16	FALSE	FALSE	GE2355	t1528	het	het	III	10838757	C	T	SNV	intron	R17.3	R17.3
gene-25	nDf16	FALSE	FALSE	GE2595	t1662 t1718	het	het	III	10839451	G	C	SNV	UTR	R17.3	R17.3
gene-25	nDf16	FALSE	FALSE	GE2355	t1528	het	het	III	12554369	C	T	SNV	intron	Y111B2A.8	aakg-1
gene-25	nDf16	FALSE	FALSE	GE2595	t1662 t1718	het	het	III	12555114	C	T	SNV	intron	Y111B2A.8	aakg-1
gene-25	nDf16	FALSE	FALSE	GE2595	t1662 t1718	het	het	III	12570567	C	T	SNV	intron	Y111B2A.8	aakg-1
gene-26	nDf16	TRUE	TRUE	GE1715	t1436	het	het	III	7337087	C	T	SNV	coding_exon	F56C9.1	gsp-2	nonsense	R->*
gene-26	nDf16	TRUE	TRUE	GE2360	t1481	het	het	III	7337383	G	A	SNV	coding_exon	F56C9.1	gsp-2	missense	G->E
O	nDf32	TRUE	TRUE	GE2063	t2042	het	het	V	6127193	G	A	SNV	coding_exon	W06H8.8	ttn-1	missense	H->Y
O	nDf32	TRUE	TRUE	GE2135	t2043	het	het	V	6169218	C	T	SNV	coding_exon	W06H8.8	ttn-1	missense	D->N
O	nDf32	TRUE	TRUE	GE2063	t2042	het	het	V	6199471	G	A	SNV	coding_exon	W06H8.8	ttn-1	missense	P->S
O	nDf32	TRUE	TRUE	GE2135	t2043	het	het	V	6497335	G	A	SNV	intron	W01A11.2	dgtr-1	splicing
O	nDf32	TRUE	TRUE	GE2063	t2042	het	het	V	6498186	G	A	SNV	coding_exon	W01A11.2	dgtr-1	missense	G->R
O	nDf32	FALSE	FALSE	GE2063	t2042	het	het	V	13989393	G	A	SNV	intron	F58E10.1	ric-7
O	nDf32	FALSE	FALSE	GE2135	t2043	het	het	V	14004045	G	A	SNV	intron	F58E10.1	ric-7
O	nDf32	FALSE	FALSE	GE2135	t2043	het	het	V	16258486	A	T	SNV	coding_exon	T13F3.2	nhr-218	start_ATG	M->L
O	nDf32	FALSE	FALSE	GE2063	t2042	het	het	V	16258796	G	A	SNV	coding_exon	T13F3.2	nhr-218	missense	A->T
P	nDf32	TRUE	TRUE	GE2469	t2173	het	het	V	6783986	A	T	SNV	coding_exon	ZC404.8	spn-4	nonsense	L->*
P	nDf32	TRUE	TRUE	GE2317	t2098	het	het	V	6784646	A	T	SNV	coding_exon	ZC404.8	spn-4	missense	V->D
gene-11	nDf40	FALSE	FALSE	GE2219	t1501	het	het	III	6751089	C	T	SNV	coding_exon	K07E12.1	dig-1	missense	P->S
gene-11	nDf40	FALSE	FALSE	GE2347	t1519	het	het	III	6751199	C	T	SNV	coding_exon	K07E12.1	dig-1	synonymous	V->V
gene-11	nDf40	FALSE	FALSE	GE2219	t1501	het	het	III	6765774	C	T	SNV	coding_exon	K07E12.1	dig-1	missense	H->Y
gene-11	nDf40	TRUE	FALSE	GE2347	t1519	het	het	III	9759805	G	A	SNV	coding_exon	T05G5.7	rmd-1	missense	G->R
gene-11	nDf40	TRUE	FALSE	GE2219	t1501	het	het	III	9759929	G	A	SNV	coding_exon	T05G5.7	rmd-1	missense	R->H
gene-11	nDf40	TRUE	TRUE	GE2219	t1501	het	het	III	10168208	G	A	SNV	intron	K08E5.3	mua-3
gene-11	nDf40	TRUE	TRUE	GE2219	t1501	het	het	III	10172574	G	A	SNV	intron	K08E5.3	mua-3
gene-11	nDf40	TRUE	TRUE	GE2219	t1501	het	het	III	10179498	G	A	SNV	coding_exon	K08E5.3	mua-3	missense	C->Y
gene-11	nDf40	TRUE	TRUE	GE2347	t1519	het	het	III	10182998	G	A	SNV	coding_exon	K08E5.3	mua-3	missense	R->H
gene-11	nDf40	TRUE	TRUE	GE2347	t1519	het	het	III	10190233	G	A	SNV	coding_exon	T20G5.5	epac-1	missense	G->E
gene-11	nDf40	TRUE	TRUE	GE2219	t1501	het	het	III	10191373	G	A	SNV	coding_exon	T20G5.5	epac-1	missense	V->M
gene-12	nDf40	FALSE	FALSE	GE2613	t1677	het	het	III	1586654	C	T	SNV	intron	Y22D7AL.8	sms-3
gene-12	nDf40	FALSE	FALSE	GE2613	t1677	het	het	III	1586886	C	T	SNV	intron	Y22D7AL.8	sms-3
gene-12	nDf40	FALSE	FALSE	GE1734	t1438 t1477	het	het	III	1596551	C	T	SNV	intron	Y22D7AL.8	sms-3
gene-12	nDf40	TRUE	FALSE	GE1734	t1438 t1477	het	het	III	9707175	C	T	SNV	coding_exon	C07A9.3	tlk-1	nonsense	Q->*
gene-12	nDf40	TRUE	FALSE	GE2613	t1677	het	het	III	9708080	G	A	SNV	coding_exon	C07A9.3	tlk-1	missense	A->T
gene-12	nDf40	TRUE	FALSE	GE2613	t1677	het	het	III	11175502	C	T	SNV	coding_exon	Y47D3A.6	tra-1	synonymous	G->G
gene-12	nDf40	TRUE	FALSE	GE1734	t1438 t1477	het	het	III	11183686	C	T	SNV	intron	Y47D3A.6	tra-1
gene-12	nDf40	TRUE	FALSE	GE2613	t1677	het	het	III	11188015	G	A	SNV	intron	Y47D3A.6	tra-1
gene-13	nDf40	FALSE	FALSE	GE2577	t1642	het	het	III	787193	C	T	SNV	intron	F42G9.7	snt-2
gene-13	nDf40	FALSE	FALSE	GE2612	t1676	het	het	III	793091	G	A	SNV	intron	F42G9.7	snt-2
gene-13	nDf40	FALSE	FALSE	GE2612	t1676	het	het	III	2284747	G	A	SNV	intron	Y54F10BM.3	Y54F10BM.3
gene-13	nDf40	FALSE	FALSE	GE2577	t1642	het	het	III	2289017	C	T	SNV	coding_exon	Y54F10BM.3	Y54F10BM.3	missense	L->F
gene-13	nDf40	FALSE	FALSE	GE2612	t1676	het	het	III	3968231	C	T	SNV	intron	R10E9.1	msi-1
gene-13	nDf40	FALSE	FALSE	GE2577	t1642	het	het	III	3973684	T	A	SNV	intron	R10E9.1	msi-1
gene-13	nDf40	FALSE	FALSE	GE2612	t1676	het	het	III	5667087	C	T	SNV	intron	F54E7.3	par-3
gene-13	nDf40	FALSE	FALSE	GE2577	t1642	het	het	III	5675272	C	T	SNV	coding_exon	F54E7.3	par-3	synonymous	S->S
gene-13	nDf40	FALSE	FALSE	GE2612	t1676	het	het	III	6596343	C	T	SNV	coding_exon	F20H11.2	let-765	missense	A->T
gene-13	nDf40	FALSE	FALSE	GE2577	t1642	het	het	III	6601064	C	T	SNV	coding_exon	F20H11.2	let-765	synonymous	A->A
gene-13	nDf40	TRUE	TRUE	GE2612	t1676	het	het	III	10245480	G	A	SNV	coding_exon	R01H10.1	div-1	nonsense	Q->*
gene-13	nDf40	TRUE	TRUE	GE2577	t1642	het	het	III	10248544	C	T	SNV	coding_exon	R01H10.1	div-1	start_ATG	M->I
gene-13	nDf40	TRUE	FALSE	GE2612	t1676	het	het	III	12543499	G	A	SNV	intron	Y111B2A.8	aakg-1
gene-13	nDf40	TRUE	FALSE	GE2577	t1642	het	het	III	12555886	C	T	SNV	intron	Y111B2A.8	aakg-1
gene-13	nDf40	TRUE	FALSE	GE2577	t1642	het	het	III	12635126	C	G	SNV	intron	Y111B2A.14	pqn-80
gene-13	nDf40	TRUE	FALSE	GE2612	t1676	het	het	III	12639902	G	A	SNV	intron	Y111B2A.14	pqn-80
gene-13	nDf40	TRUE	FALSE	GE2612	t1676	het	het	III	12642428	G	A	SNV	intron	Y111B2A.14	pqn-80
C	nDf41	TRUE	FALSE	GE2028	t1801	het	het	IV	2305483	T	A	SNV	intron	Y38F2AL.2	mksr-2
C	nDf41	TRUE	FALSE	GE1932	t1732	het	het	IV	2305586	C	T	SNV	intron	Y38F2AL.2	mksr-2
C	nDf41	TRUE	FALSE	GE1932	t1732	het	het	IV	2498496	CAAAAA	CAAAA	deletion	intron	Y69A2AR.16	Y69A2AR.16
C	nDf41	TRUE	FALSE	GE1932	t1732	het	het	IV	2515135	C	T	SNV	coding_exon	Y69A2AR.16	Y69A2AR.16	missense	R->W
C	nDf41	TRUE	FALSE	GE2028	t1801	het	het	IV	2525034	G	A	SNV	intron	Y69A2AR.16	Y69A2AR.16
C	nDf41	TRUE	FALSE	GE2028	t1801	het	het	IV	7552230	A	C	SNV	coding_exon	F49E8.5	dif-1	nonsense	Y->*
C	nDf41	TRUE	FALSE	GE1932	t1732	het	het	IV	7552641	C	T	SNV	coding_exon	F49E8.5	dif-1	missense	G->D
C	nDf41	FALSE	FALSE	GE2028	t1801	het	het	IV	12663523	A	G	SNV	intron	C26H9A.2	wdfy-3
C	nDf41	FALSE	FALSE	GE2028	t1801	het	het	IV	12663848	A	T	SNV	coding_exon	C26H9A.2	wdfy-3	missense	H->L
C	nDf41	FALSE	FALSE	GE1932	t1732	het	het	IV	12673152	T	A	SNV	coding_exon	C26H9A.2	wdfy-3	missense	V->E
F	nDf41	TRUE	FALSE	GE2453	t1900	het	het	IV	4396806	G	A	SNV	intron	Y24D9A.1	ell-1
F	nDf41	TRUE	FALSE	GE2453	t1900	het	het	IV	4397390	G	A	SNV	intron	Y24D9A.1	ell-1
F	nDf41	TRUE	FALSE	GE2391	t1932	het	het	IV	4411118	G	A	SNV	intron	Y24D9A.1	ell-1
F	nDf41	TRUE	TRUE	GE2391	t1932	het	het	IV	5696931	A	T	SNV	coding_exon	C55C3.5	perm-5	missense	C->S
F	nDf41	TRUE	TRUE	GE2453	t1900	het	het	IV	5698096	A	G	SNV	coding_exon	C55C3.5	perm-5	missense	S->P
G	nDf41	TRUE	TRUE	GE2455	t1914	het	het	IV	7040335	T	C	SNV	coding_exon	C06G3.2	klp-18	missense	Y->H
G	nDf41	TRUE	TRUE	GE2000	t1795	het	het	IV	7041203	G	A	SNV	coding_exon	C06G3.2	klp-18	missense	E->K
v	nDf41	TRUE	FALSE	GE2091	t1772	het	hom	IV	567196	G	A	SNV	intron	F56A11.3	efn-4
v	nDf41	TRUE	FALSE	GE2288	t1835	het	hom	IV	567309	C	T	SNV	intron	F56A11.3	efn-4
v	nDf41	TRUE	FALSE	GE2288	t1835	het	het	IV	1925991	T	A	SNV	intron	F52C12.4	denn-4
v	nDf41	TRUE	FALSE	GE2091	t1772	het	het	IV	1943025	G	A	SNV	intron	F52C12.4	denn-4
v	nDf41	TRUE	FALSE	GE2288	t1835	het	het	IV	2651409	C	T	SNV	intron	Y69A2AR.31	Y69A2AR.31
v	nDf41	TRUE	FALSE	GE2091	t1772	het	het	IV	2651892	G	A	SNV	coding_exon	Y69A2AR.31	Y69A2AR.31	missense	R->C
v	nDf41	TRUE	FALSE	GE2288	t1835	het	het	IV	2651936	T	A	SNV	coding_exon	Y69A2AR.31	Y69A2AR.31	missense	Y->F
v	nDf41	TRUE	FALSE	GE2288	t1835	het	het	IV	3229313	C	T	SNV	intron	Y67D8A.2	Y67D8A.2
v	nDf41	TRUE	FALSE	GE2091	t1772	het	het	IV	3230357	G	A	SNV	intron	Y67D8A.2	Y67D8A.2
v	nDf41	TRUE	TRUE	GE2091	t1772	het	het	IV	6604731	A	T	SNV	coding_exon	F15B10.1	nstp-2	missense	L->H
v	nDf41	TRUE	TRUE	GE2288	t1835	het	het	IV	6605266	C	T	SNV	coding_exon	F15B10.1	nstp-2	missense	G->R
v	nDf41	TRUE	TRUE	GE2091	t1772	het	het	IV	6917282	T	C	SNV	coding_exon	T22D1.10	ruvb-2	synonymous	*->*
v	nDf41	TRUE	TRUE	GE2288	t1835	het	het	IV	6918953	G	T	SNV	coding_exon	T22D1.10	ruvb-2	synonymous	V->V
v	nDf41	FALSE	FALSE	GE2288	t1835	het	het	IV	8177177	C	T	SNV	coding_exon	C07G1.3	pct-1	synonymous	T->T
v	nDf41	FALSE	FALSE	GE2091	t1772	het	het	IV	8183400	G	A	SNV	intron	C07G1.3	pct-1
v	nDf41	FALSE	FALSE	GE2091	t1772	het	het	IV	9892891	G	A	SNV	coding_exon	F32B6.5	sss-1	missense	L->F
v	nDf41	FALSE	FALSE	GE2091	t1772	het	het	IV	9893009	A	T	SNV	intron	F32B6.5	sss-1
v	nDf41	FALSE	FALSE	GE2288	t1835	het	het	IV	9893358	C	T	SNV	coding_exon	F32B6.5	sss-1	missense	E->K
v	nDf41	FALSE	FALSE	GE2288	t1835	het	het	IV	9989972	C	T	SNV	coding_exon	C47E12.5	uba-1	missense	G->D
v	nDf41	FALSE	FALSE	GE2091	t1772	het	het	IV	9994693	C	G	SNV	intron	C47E12.5	uba-1
v	nDf41	FALSE	FALSE	GE2288	t1835	het	het	IV	10690547	T	G	SNV	coding_exon	R102.3	R102.3	missense	H->Q
v	nDf41	FALSE	FALSE	GE2091	t1772	het	het	IV	10690818	A	G	SNV	coding_exon	R102.3	R102.3	missense	T->A
v	nDf41	FALSE	FALSE	GE2091	t1772	het	het	IV	10691169	G	A	SNV	coding_exon	R102.3	R102.3	missense	E->K
v	nDf41	FALSE	FALSE	GE2091	t1772	het	het	IV	11036607	G	A	SNV	coding_exon	F36H1.1	fkb-1	missense	G->R
v	nDf41	FALSE	FALSE	GE2288	t1835	het	het	IV	11037071	G	A	SNV	coding_exon	F36H1.1	fkb-1	missense	M->I
vz	nDf41	TRUE	TRUE	GE2890	t1821	het	het	IV	7150054	G	A	SNV	coding_exon	C34D4.4	C34D4.4	nonsense	W->*
vz	nDf41	TRUE	TRUE	GE2840	t1860	het	het	IV	7150143	G	A	SNV	coding_exon	C34D4.4	C34D4.4	nonsense	W->*
vz	nDf41	FALSE	FALSE	GE2890	t1821	het	het	IV	8857855	G	A	SNV	coding_exon	T11B7.4	alp-1	synonymous	K->K
vz	nDf41	FALSE	FALSE	GE2840	t1860	het	het	IV	8862174	G	A	SNV	UTR	T11B7.4	alp-1
gene-27	none of the tested deficiencies	FALSE	TRUE	GE1722	t1435	het	het	III	8701605	C	T	SNV	coding_exon	B0303.9	vps-33.1	nonsense	R->*
gene-27	none of the tested deficiencies	FALSE	TRUE	GE2366	t1561	het	het	III	8702923	G	A	SNV	coding_exon	B0303.9	vps-33.1	nonsense	W->*
gene-28	none of the tested deficiencies	FALSE	FALSE	GE1742	t1461	het	het	III	11981410	G	A	SNV	intron	Y56A3A.31	Y56A3A.31
gene-28	none of the tested deficiencies	FALSE	FALSE	GE2200	t1480	het	het	III	11982354	G	A	SNV	intron	Y56A3A.31	Y56A3A.31
gene-28	none of the tested deficiencies	FALSE	FALSE	GE2200	t1480	het	het	III	12969933	G	A	SNV	coding_exon	Y39E4A.3	bckd-1A	nonsense	Q->*
gene-28	none of the tested deficiencies	FALSE	FALSE	GE1742	t1461	het	het	III	12971429	G	A	SNV	coding_exon	Y39E4A.3	bckd-1A	nonsense	Q->*
gene-29	none of the tested deficiencies	FALSE	TRUE	GE1720	t1446	het	het	III	6023951	C	T	SNV	coding_exon	ZK328.1	cyk-3	missense	P->L
gene-29	none of the tested deficiencies	FALSE	TRUE	GE2646	t1600	het	het	III	6023951	C	T	SNV	coding_exon	ZK328.1	cyk-3	missense	P->L
gene-30	none of the tested deficiencies	TRUE	TRUE	GE2352	t1535	het	het	III	2690301	G	A	SNV	UTR	Y71H2AM.9	Y71H2AM.9
gene-30	none of the tested deficiencies	TRUE	TRUE	GE2345	t1525	het	het	III	2697895	C	T	SNV	intron	Y71H2AM.9	Y71H2AM.9
gene-30	none of the tested deficiencies	TRUE	TRUE	GE2345	t1525	het	het	III	3874823	C	T	SNV	intron	F13B10.1	tir-1
gene-30	none of the tested deficiencies	TRUE	TRUE	GE2352	t1535	het	het	III	3894145	G	A	SNV	intron	F13B10.1	tir-1
gene-30	none of the tested deficiencies	TRUE	TRUE	GE2345	t1525	het	het	III	4974772	C	T	SNV	coding_exon	C27F2.2	nca-2	missense	S->F
gene-30	none of the tested deficiencies	TRUE	TRUE	GE2352	t1535	het	het	III	4976622	G	A	SNV	coding_exon	C27F2.2	nca-2	missense	A->T
gene-30	none of the tested deficiencies	FALSE	TRUE	GE2345	t1525	het	het	III	6020590	C	T	SNV	coding_exon	ZK328.1	cyk-3	nonsense	Q->*
gene-30	none of the tested deficiencies	FALSE	TRUE	GE2352	t1535	het	het	III	6022863	G	A	SNV	coding_exon	ZK328.1	cyk-3	nonsense	W->*
gene-30	none of the tested deficiencies	FALSE	TRUE	GE2352	t1535	het	het	III	11182120	G	A	SNV	UTR	Y47D3A.6	tra-1
gene-30	none of the tested deficiencies	FALSE	TRUE	GE2345	t1525	het	het	III	11188051	C	T	SNV	intron	Y47D3A.6	tra-1
gene-30	none of the tested deficiencies	FALSE	FALSE	GE2352	t1535	het	het	III	11836398	G	A	SNV	intron	Y56A3A.1	ntl-3
gene-30	none of the tested deficiencies	FALSE	FALSE	GE2345	t1525	het	het	III	11845113	C	T	SNV	coding_exon	Y56A3A.1	ntl-3	missense	E->K
gene-30	none of the tested deficiencies	FALSE	FALSE	GE2345	t1525	het	het	III	11979366	C	T	SNV	intron	Y56A3A.31	Y56A3A.31
gene-30	none of the tested deficiencies	FALSE	FALSE	GE2352	t1535	het	het	III	11985515	G	A	SNV	intron	Y56A3A.31	Y56A3A.31
gene-31	none of the tested deficiencies	TRUE	TRUE	GE2583	t1654	het	het	III	5729355	G	A	SNV	coding_exon	B0244.8	egg-1	missense	D->N
gene-31	none of the tested deficiencies	TRUE	TRUE	GE2692	t1717	het	het	III	5730061	C	T	SNV	UTR	B0244.8	egg-1
gene-31	none of the tested deficiencies	FALSE	FALSE	GE2583	t1654	het	hom	III	8287195	G	A	SNV	intron	F10E9.6	mig-10
gene-31	none of the tested deficiencies	FALSE	FALSE	GE2692	t1717	het	hom	III	8297789	C	T	SNV	intron	F10E9.6	mig-10
gene-31	none of the tested deficiencies	FALSE	TRUE	GE2583	t1654	het	het	III	9615498	G	A	SNV	coding_exon	F58A4.3	hcp-3	missense	R->C
gene-31	none of the tested deficiencies	FALSE	TRUE	GE2692	t1717	het	het	III	9615555	C	T	SNV	coding_exon	F58A4.3	hcp-3	missense	E->K
gene-31	none of the tested deficiencies	FALSE	FALSE	GE2692	t1717	het	het	III	11566378	C	T	SNV	coding_exon	Y66D12A.10	Y66D12A.10	synonymous	Y->Y
gene-31	none of the tested deficiencies	FALSE	FALSE	GE2583	t1654	het	het	III	11567161	A	T	SNV	intron	Y66D12A.10	Y66D12A.10
gene-31	none of the tested deficiencies	FALSE	FALSE	GE2583	t1654	het	het	III	12642041	G	A	SNV	coding_exon	Y111B2A.14	pqn-80	synonymous	E->E
gene-31	none of the tested deficiencies	FALSE	FALSE	GE2692	t1717	het	het	III	12646982	C	T	SNV	intron	Y111B2A.14	pqn-80
gene-32	none of the tested deficiencies	TRUE	TRUE	GE2545	t1577	het	het	III	3652401	G	A	SNV	coding_exon	C46F11.2	gsr-1	missense	G->R
gene-32	none of the tested deficiencies	TRUE	TRUE	GE2644	t1594	het	het	III	3652407	C	T	SNV	coding_exon	C46F11.2	gsr-1	nonsense	R->*
gene-32	none of the tested deficiencies	FALSE	FALSE	GE2644	t1594	het	het	III	12693100	C	T	SNV	intron	Y111B2A.19	spin-4
gene-32	none of the tested deficiencies	FALSE	FALSE	GE2545	t1577	het	het	III	12696852	C	T	SNV	intron	Y111B2A.19	spin-4
gene-32	none of the tested deficiencies	FALSE	FALSE	GE2644	t1594	het	het	III	13189903	T	A	SNV	intron	Y39E4B.12	gly-5
gene-32	none of the tested deficiencies	FALSE	FALSE	GE2545	t1577	het	het	III	13200927	G	A	SNV	coding_exon	Y39E4B.12	gly-5	synonymous	A->A
gene-33	none of the tested deficiencies	FALSE	TRUE	GE1718	t1441	het	het	III	6000484	G	A	SNV	intron	T04C9.1	T04C9.1
gene-33	none of the tested deficiencies	FALSE	TRUE	GE2533	t1638	het	hom	III	6006164	C	T	SNV	UTR	T04C9.1	T04C9.1
gene-33	none of the tested deficiencies	FALSE	FALSE	GE2533	t1638	het	het	III	12069354	A	T	SNV	intron	Y79H2A.11	zyg-8
gene-33	none of the tested deficiencies	FALSE	FALSE	GE2534	t1639	het	het	III	12069369-12069742	-	-	372-bp deletion + 6-bp insertion	intron + exon	Y79H2A.11	zyg-8	deletion + insertion
gene-33	none of the tested deficiencies	FALSE	FALSE	GE1718	t1441	het	het	III	12069655	A	G	SNV	coding_exon	Y79H2A.11	zyg-8	missense	D->G
gene-33	none of the tested deficiencies	FALSE	FALSE	GE2533	t1638	het	het	III	13547582	C	T	SNV	coding_exon	Y76A2B.5	Y76A2B.5	missense	A->T
gene-33	none of the tested deficiencies	FALSE	FALSE	GE1718	t1441	het	het	III	13548681	G	A	SNV	intron	Y76A2B.5	Y76A2B.5
gene-35	none of the tested deficiencies	TRUE	TRUE	GE1735	t1470	het	het	III	1174235	C	T	SNV	intron	Y71D11A.1	cdh-12
gene-35	none of the tested deficiencies	TRUE	TRUE	GE1735	t1470	het	het	III	1174970	C	T	SNV	intron	Y71D11A.1	cdh-12
gene-35	none of the tested deficiencies	TRUE	TRUE	GE2958	t1464 t1484	het	het	III	1177717	C	T	SNV	coding_exon	Y71D11A.1	cdh-12	missense	S->F
gene-35	none of the tested deficiencies	TRUE	TRUE	GE1735	t1470	het	het	III	1629785	C	T	SNV	intron	Y22D7AL.4	Y22D7AL.4
gene-35	none of the tested deficiencies	TRUE	TRUE	GE2958	t1464 t1484	het	het	III	1635613	C	T	SNV	intron	Y22D7AL.4	Y22D7AL.4
gene-35	none of the tested deficiencies	FALSE	FALSE	GE1735	t1470	het	het	III	8280505	C	T	SNV	intron	F10E9.6	mig-10
gene-35	none of the tested deficiencies	FALSE	FALSE	GE2958	t1464 t1484	het	het	III	8290018	C	T	SNV	intron	F10E9.6	mig-10
gene-35	none of the tested deficiencies	FALSE	FALSE	GE2958	t1464 t1484	het	het	III	11951669	C	T	SNV	coding_exon	Y56A3A.27	top-3	missense	G->R
gene-35	none of the tested deficiencies	FALSE	FALSE	GE1735	t1470	het	het	III	11957085	C	T	SNV	intron	Y56A3A.27	top-3
gene-35	none of the tested deficiencies	FALSE	FALSE	GE1735	t1470	het	het	III	11957525	C	T	SNV	coding_exon	Y56A3A.27	top-3	nonsense	W->*
B	none of the tested deficiencies	TRUE	TRUE	GE2034	t1808	het	het	IV	3990646	C	T	SNV	coding_exon	F47C12.2	clec-78	missense	S->L
B	none of the tested deficiencies	TRUE	TRUE	GE2035	t1809	het	het	IV	3996933	G	A	SNV	intron	F47C12.2	clec-78
B	none of the tested deficiencies	FALSE	FALSE	GE2034	t1808	het	het	IV	12887810	G	A	SNV	coding_exon	K08D8.6	K08D8.6	missense	T->I
B	none of the tested deficiencies	FALSE	FALSE	GE2035	t1809	het	het	IV	12889703	T	A	SNV	coding_exon	K08D8.6	K08D8.6	missense	Q->H
B	none of the tested deficiencies	FALSE	FALSE	GE2035	t1809	het	het	IV	13064097	C	T	SNV	intron	C39E9.2	scl-5
B	none of the tested deficiencies	FALSE	FALSE	GE2034	t1808	het	het	IV	13064326	T	C	SNV	intron	C39E9.2	scl-5
B	none of the tested deficiencies	FALSE	TRUE	GE2035	t1809	het	het	IV	13837780	T	A	SNV	intron	H08M01.2	rga-5
B	none of the tested deficiencies	FALSE	TRUE	GE2034	t1808	het	het	IV	13844596	G	A	SNV	coding_exon	H08M01.2	rga-5	missense	V->M
B	none of the tested deficiencies	FALSE	TRUE	GE2034	t1808	het	het	IV	17177172	A	T	SNV	intron	C52D10.3	C52D10.3
B	none of the tested deficiencies	FALSE	TRUE	GE2035	t1809	het	het	IV	17186724	C	T	SNV	intron	C52D10.3	C52D10.3
E	none of the tested deficiencies	TRUE	TRUE	GE2433	t1885	het	hom	IV	807889	C	T	SNV	UTR	Y55F3BL.2	zipt-20
E	none of the tested deficiencies	TRUE	TRUE	GE2189	t1750	het	hom	IV	818759	G	A	SNV	intron	Y55F3BL.2	zipt-20
E	none of the tested deficiencies	TRUE	TRUE	GE2189	t1750	het	het	IV	2968337	C	T	SNV	coding_exon	Y54G2A.25	lad-2	missense	E->K
E	none of the tested deficiencies	TRUE	TRUE	GE2433	t1885	het	het	IV	2968915	C	T	SNV	coding_exon	Y54G2A.25	lad-2	missense	A->T
E	none of the tested deficiencies	TRUE	TRUE	GE2433	t1885	het	het	IV	3762254	C	T	SNV	intron	Y37E11AR.6	vab-2
E	none of the tested deficiencies	TRUE	TRUE	GE2189	t1750	het	het	IV	3763475	C	T	SNV	intron	Y37E11AR.6	vab-2
E	none of the tested deficiencies	FALSE	TRUE	GE2189	t1750	het	het	IV	10282013	A	T	SNV	coding_exon	Y43C5A.6	rad-51	missense	I->N
E	none of the tested deficiencies	FALSE	TRUE	GE2433	t1885	het	het	IV	10282328	C	T	SNV	coding_exon	Y43C5A.6	rad-51	missense	V->I
E	none of the tested deficiencies	FALSE	FALSE	GE2189	t1750	het	het	IV	11588986	G	A	SNV	intron	F40F11.4	F40F11.4
E	none of the tested deficiencies	FALSE	FALSE	GE2433	t1885	het	het	IV	11589317	C	T	SNV	intron	F40F11.4	F40F11.4
E	none of the tested deficiencies	FALSE	TRUE	GE2189	t1750	het	het	IV	14237699	G	T	SNV	intron	Y64G10A.1	Y64G10A.1
E	none of the tested deficiencies	FALSE	TRUE	GE2433	t1885	het	het	IV	14239074	C	T	SNV	coding_exon	Y64G10A.1	Y64G10A.1	start_ATG	M->I
E	none of the tested deficiencies	FALSE	TRUE	GE2433	t1885	het	het	IV	15446042	C	T	SNV	intron	Y73F8A.24	Y73F8A.24
E	none of the tested deficiencies	FALSE	TRUE	GE2189	t1750	het	het	IV	15449966	A	T	SNV	intron	Y73F8A.24	Y73F8A.24
E	none of the tested deficiencies	FALSE	TRUE	GE2189	t1750	het	het	IV	15450038	A	T	SNV	intron	Y73F8A.24	Y73F8A.24
N	none of the tested deficiencies	TRUE	TRUE	GE2305	t1867	het	het	IV	5139395	C	T	SNV	intron	AC7.2	soc-2
N	none of the tested deficiencies	TRUE	TRUE	GE2153	t1773	het	het	IV	5139486	C	T	SNV	intron	AC7.2	soc-2
N	none of the tested deficiencies	FALSE	TRUE	GE2153	t1773	het	het	IV	15401802	C	T	SNV	intron	Y73F8A.21	nhr-5
N	none of the tested deficiencies	FALSE	TRUE	GE2305	t1867	het	het	IV	15403186	C	T	SNV	coding_exon	Y73F8A.21	nhr-5	synonymous	F->F
N	none of the tested deficiencies	TRUE	TRUE	GE2153	t1773	het	het	IV	4444464	C	T	SNV	coding_exon	R08C7.10	wapl-1	nonsense	W->*
N	none of the tested deficiencies	TRUE	TRUE	GE2305	t1867	het	het	IV	4442749-4442872			122-bp deletion	coding_exon	R08C7.10	wapl-1	deletion
o	none of the tested deficiencies	TRUE	TRUE	GE2077	t1757	het	het	IV	2267802	C	T	SNV	intron	M70.5	M70.5
o	none of the tested deficiencies	TRUE	TRUE	GE2526	t1937	het	het	IV	2268121	C	T	SNV	intron	M70.5	M70.5
o	none of the tested deficiencies	FALSE	FALSE	GE2077	t1757	het	het	IV	12808522	T	A	SNV	intron	F07C6.4	F07C6.4
o	none of the tested deficiencies	FALSE	FALSE	GE2526	t1937	het	het	IV	12829941	C	T	SNV	UTR	F07C6.4	F07C6.4
p_pair1	none of the tested deficiencies	TRUE	TRUE	GE2387	t1913	het	het	IV	3001767	G	A	SNV	coding_exon	Y54G2A.73	Y54G2A.73	nonsense	R->*
p_pair1	none of the tested deficiencies	TRUE	TRUE	GE2551	t1792	het	het	IV	3004529	G	A	SNV	intron	Y54G2A.73	Y54G2A.73
p_pair1	none of the tested deficiencies	TRUE	TRUE	GE2387	t1913	het	het	IV	4236202	G	A	SNV	coding_exon	F30B5.1	dpy-13	missense	G->R
p_pair1	none of the tested deficiencies	TRUE	TRUE	GE2551	t1792	het	het	IV	4236397	G	A	SNV	coding_exon	F30B5.1	dpy-13	missense	G->R
p_pair1	none of the tested deficiencies	FALSE	FALSE	GE2551	t1792	het	het	IV	9160720	G	A	SNV	UTR	F23B2.12	pcp-2
p_pair1	none of the tested deficiencies	FALSE	FALSE	GE2387	t1913	het	het	IV	9162855	G	A	SNV	coding_exon	F23B2.12	pcp-2	synonymous	F->F
p_pair1	none of the tested deficiencies	FALSE	TRUE	GE2387	t1913	het	het	IV	13490090	A	T	SNV	intron	Y45F10A.6	tbc-9
p_pair1	none of the tested deficiencies	FALSE	TRUE	GE2551	t1792	het	het	IV	13498415	C	T	SNV	intron	Y45F10A.6	tbc-9
p_pair1	none of the tested deficiencies	FALSE	TRUE	GE2551	t1792	het	het	IV	13500981	C	T	SNV	coding_exon	Y45F10A.6	tbc-9	synonymous	P->P
p_pair2	none of the tested deficiencies	TRUE	TRUE	GE2738	t1833	het	het	IV	3000662	A	T	SNV	coding_exon	Y54G2A.73	Y54G2A.73	nonsense	L->*
p_pair2	none of the tested deficiencies	TRUE	TRUE	GE2387	t1913	het	het	IV	3001767	G	A	SNV	coding_exon	Y54G2A.73	Y54G2A.73	nonsense	R->*
p_pair3	none of the tested deficiencies	TRUE	TRUE	GE2387	t1913	het	het	IV	3001767	G	A	SNV	coding_exon	Y54G2A.73	Y54G2A.73	nonsense	R->*
p_pair3	none of the tested deficiencies	TRUE	TRUE	GE2884	t1755	het	het	IV	3008481	C	T	SNV	intron	Y54G2A.73	Y54G2A.73	splicing
p_pair3	none of the tested deficiencies	FALSE	FALSE	GE2387	t1913	het	het	IV	7636311	G	A	SNV	coding_exon	F45E4.7	nep-16	missense	P->L
p_pair3	none of the tested deficiencies	FALSE	FALSE	GE2884	t1755	het	het	IV	7639643	AC	A	deletion	intron	F45E4.7	nep-16
p_pair3	none of the tested deficiencies	FALSE	FALSE	GE2387	t1913	het	het	IV	9344358	G	A	SNV	coding_exon	C10C5.1	pezo-1	missense	T->I
p_pair3	none of the tested deficiencies	FALSE	FALSE	GE2884	t1755	het	het	IV	9363741	C	T	SNV	coding_exon	C10C5.1	pezo-1	missense	A->T
p_pair4	none of the tested deficiencies	TRUE	TRUE	GE2551	t1792	het	het	IV	2501757	C	T	SNV	intron	Y69A2AR.16	Y69A2AR.16
p_pair4	none of the tested deficiencies	TRUE	TRUE	GE2551	t1792	het	het	IV	2502051	G	A	SNV	intron	Y69A2AR.16	Y69A2AR.16
p_pair4	none of the tested deficiencies	TRUE	TRUE	GE2738	t1833	het	het	IV	2518588	G	A	SNV	intron	Y69A2AR.16	Y69A2AR.16
p_pair4	none of the tested deficiencies	TRUE	TRUE	GE2738	t1833	het	het	IV	2542929	G	A	SNV	intron	Y69A2AR.15	sprr-3
p_pair4	none of the tested deficiencies	TRUE	TRUE	GE2738	t1833	het	het	IV	2543298	G	A	SNV	intron	Y69A2AR.15	sprr-3
p_pair4	none of the tested deficiencies	TRUE	TRUE	GE2551	t1792	het	het	IV	2545666	G	A	SNV	intron	Y69A2AR.15	sprr-3
p_pair4	none of the tested deficiencies	TRUE	TRUE	GE2738	t1833	het	het	IV	3000662	A	T	SNV	coding_exon	Y54G2A.73	Y54G2A.73	nonsense	L->*
p_pair4	none of the tested deficiencies	TRUE	TRUE	GE2551	t1792	het	het	IV	3004529	G	A	SNV	intron	Y54G2A.73	Y54G2A.73
p_pair4	none of the tested deficiencies	FALSE	FALSE	GE2738	t1833	het	het	IV	11986362	C	T	SNV	coding_exon	ZK617.1	unc-22	missense	S->N
p_pair4	none of the tested deficiencies	FALSE	FALSE	GE2551	t1792	het	het	IV	12005731	G	A	SNV	intron	ZK617.1	unc-22
p_pair5	none of the tested deficiencies	TRUE	TRUE	GE2551	t1792	het	het	IV	1926546	A	T	SNV	intron	F52C12.4	denn-4
p_pair5	none of the tested deficiencies	TRUE	TRUE	GE2551	t1792	het	het	IV	1938506	G	A	SNV	intron	F52C12.4	denn-4
p_pair5	none of the tested deficiencies	TRUE	TRUE	GE2884	t1755	het	het	IV	1938869	C	T	SNV	intron	F52C12.4	denn-4
p_pair5	none of the tested deficiencies	TRUE	TRUE	GE2551	t1792	het	het	IV	3004529	G	A	SNV	intron	Y54G2A.73	Y54G2A.73
p_pair5	none of the tested deficiencies	TRUE	TRUE	GE2884	t1755	het	het	IV	3008481	C	T	SNV	intron	Y54G2A.73	Y54G2A.73	splicing
p_pair5	none of the tested deficiencies	TRUE	TRUE	GE2551	t1792	het	het	IV	5128508	G	A	SNV	intron	AC7.2	soc-2
p_pair5	none of the tested deficiencies	TRUE	TRUE	GE2884	t1755	het	het	IV	5149105	T	A	SNV	intron	AC7.2	soc-2
p_pair5	none of the tested deficiencies	FALSE	FALSE	GE2551	t1792	het	het	IV	9200341	A	T	SNV	UTR	C46C2.1	wnk-1
p_pair5	none of the tested deficiencies	FALSE	FALSE	GE2884	t1755	het	het	IV	9210548	C	T	SNV	coding_exon	C46C2.1	wnk-1	missense	P->S
p_pair6	none of the tested deficiencies	TRUE	TRUE	GE2884	t1755	het	het	IV	2344066	C	A	SNV	intron	Y38F2AR.7	ppgn-1
p_pair6	none of the tested deficiencies	TRUE	TRUE	GE2738	t1833	het	het	IV	2346309	C	T	SNV	intron	Y38F2AR.7	ppgn-1
p_pair6	none of the tested deficiencies	TRUE	TRUE	GE2738	t1833	het	het	IV	2346310	C	T	SNV	intron	Y38F2AR.7	ppgn-1
p_pair6	none of the tested deficiencies	TRUE	TRUE	GE2884	t1755	het	het	IV	2346813	T	C	SNV	intron	Y38F2AR.7	ppgn-1
p_pair6	none of the tested deficiencies	TRUE	TRUE	GE2738	t1833	het	het	IV	3000662	A	T	SNV	coding_exon	Y54G2A.73	Y54G2A.73	nonsense	L->*
p_pair6	none of the tested deficiencies	TRUE	TRUE	GE2884	t1755	het	het	IV	3008481	C	T	SNV	intron	Y54G2A.73	Y54G2A.73	splicing
p_pair6	none of the tested deficiencies	TRUE	FALSE	GE2884	t1755	het	het	IV	6245421	C	T	SNV	coding_exon	F58F9.7	acox-3	missense	R->K
p_pair6	none of the tested deficiencies	TRUE	FALSE	GE2738	t1833	het	het	IV	6246077	G	A	SNV	coding_exon	F58F9.7	acox-3	synonymous	T->T
p_pair6	none of the tested deficiencies	FALSE	FALSE	GE2884	t1755	het	het	IV	10643227	C	T	SNV	intron	F56C4.3	glb-19
p_pair6	none of the tested deficiencies	FALSE	FALSE	GE2738	t1833	het	het	IV	10644791	C	T	SNV	intron	F56C4.3	glb-19
q	none of the tested deficiencies	TRUE	TRUE	GE2827	t1786	het	het	IV	4692945	G	A	SNV	coding_exon	T22B11.1	T22B11.1	nonsense	W->*
q	none of the tested deficiencies	TRUE	TRUE	GE2895	t1866	het	het	IV	4696017	G	A	SNV	coding_exon	T22B11.1	T22B11.1	nonsense	W->*
q	none of the tested deficiencies	TRUE	FALSE	GE2895	t1866	het	het	IV	5944449	G	A	SNV	coding_exon	K02B2.4	inx-7	nonsense	Q->*
q	none of the tested deficiencies	TRUE	FALSE	GE2827	t1786	het	het	IV	5945741	A	C	SNV	intron	K02B2.4	inx-7
q	none of the tested deficiencies	FALSE	TRUE	GE2827	t1786	het	het	IV	16003102	A	T	SNV	intron	Y105C5B.21	jac-1
q	none of the tested deficiencies	FALSE	TRUE	GE2895	t1866	het	het	IV	16009966	T	A	SNV	intron	Y105C5B.21	jac-1
r	none of the tested deficiencies	TRUE	TRUE	GE2379	t1886	het	het	IV	1866163	T	A	SNV	intron	F55A8.2	egl-4
r	none of the tested deficiencies	TRUE	TRUE	GE2836	t1780	het	het	IV	1868234	A	T	SNV	intron	F55A8.2	egl-4
r	none of the tested deficiencies	FALSE	FALSE	GE2836	t1780	het	het	IV	9888512	C	T	SNV	coding_exon	F32B6.10	F32B6.10	missense	D->N
r	none of the tested deficiencies	FALSE	FALSE	GE2379	t1886	het	het	IV	9889908	C	T	SNV	intron	F32B6.10	F32B6.10
r	none of the tested deficiencies	FALSE	FALSE	GE2379	t1886	het	het	IV	11976884	C	T	SNV	coding_exon	ZK617.1	unc-22	missense	V->I
r	none of the tested deficiencies	FALSE	FALSE	GE2836	t1780	het	het	IV	11991072	C	T	SNV	coding_exon	ZK617.1	unc-22	missense	D->N
s	none of the tested deficiencies	FALSE	FALSE	GE2824	t1758	het	het	IV	6773068	C	T	SNV	intron	C17H12.13	anat-1
s	none of the tested deficiencies	FALSE	FALSE	GE2373	t1811	het	het	IV	6777773	C	A	SNV	intron	C17H12.13	anat-1
s	none of the tested deficiencies	FALSE	FALSE	GE2824	t1758	het	het	IV	8526990	A	G	SNV	intron	C09G4.2	pkg-2
s	none of the tested deficiencies	FALSE	FALSE	GE2373	t1811	het	het	IV	8528501	C	T	SNV	intron	C09G4.2	pkg-2
s	none of the tested deficiencies	FALSE	FALSE	GE2824	t1758	het	het	IV	11126868	C	T	SNV	coding_exon	F01G4.1	swsn-4	missense	A->V
s	none of the tested deficiencies	FALSE	FALSE	GE2373	t1811	het	het	IV	11129065	T	A	SNV	coding_exon	F01G4.1	swsn-4	missense	L->M
s	none of the tested deficiencies	FALSE	FALSE	GE2373	t1811	het	het	IV	11331876	C	T	SNV	coding_exon	B0035.12	sart-3	missense	E->K
s	none of the tested deficiencies	FALSE	FALSE	GE2824	t1758	het	het	IV	11332315	G	A	SNV	coding_exon	B0035.12	sart-3	missense	A->V
s	none of the tested deficiencies	FALSE	TRUE	GE2373	t1811	het	het	IV	16013612	C	T	SNV	intron	Y105C5B.21	jac-1
s	none of the tested deficiencies	FALSE	TRUE	GE2824	t1758	het	het	IV	16025771	G	A	SNV	intron	Y105C5B.21	jac-1
a_pair1	none of the tested deficiencies	TRUE	TRUE	GE2734	t2029	het	het	V	13560728	G	A	SNV	coding_exon	C56A3.8	C56A3.8	missense	G->E
a_pair1	none of the tested deficiencies	TRUE	TRUE	GE2487	t2149	het	het	V	13561369	C	T	SNV	coding_exon	C56A3.8	C56A3.8	missense	P->L
a_pair3	none of the tested deficiencies	TRUE	TRUE	GE2886	t2055	het	het	V	12600982	T	C	SNV	coding_exon	C14C10.5	C14C10.5	missense	L->P
a_pair3	none of the tested deficiencies	TRUE	TRUE	GE2487	t2149	het	het	V	12601172	T	A	SNV	coding_exon	C14C10.5	C14C10.5	synonymous	L->L
a_pair3	none of the tested deficiencies	TRUE	TRUE	GE2886	t2055	het	het	V	13560787	G	A	SNV	coding_exon	C56A3.8	C56A3.8	missense	E->K
a_pair3	none of the tested deficiencies	TRUE	TRUE	GE2487	t2149	het	het	V	13561369	C	T	SNV	coding_exon	C56A3.8	C56A3.8	missense	P->L
a_pair3	none of the tested deficiencies	FALSE	TRUE	GE2487	t2149	het	het	V	17682804	G	A	SNV	coding_exon	F59A1.15	F59A1.15	synonymous	F->F
a_pair3	none of the tested deficiencies	FALSE	TRUE	GE2886	t2055	het	hom	V	17682804	G	A	SNV	coding_exon	F59A1.15	F59A1.15	synonymous	F->F
a_pair3	none of the tested deficiencies	FALSE	TRUE	GE2487	t2149	het	het	V	17781551	G	A	SNV	coding_exon	C47A10.6	srab-12	missense	T->I
a_pair3	none of the tested deficiencies	FALSE	TRUE	GE2886	t2055	het	hom	V	17781551	G	A	SNV	coding_exon	C47A10.6	srab-12	missense	T->I
a_pair5	none of the tested deficiencies	TRUE	TRUE	GE2734	t2029	het	het	V	13560728	G	A	SNV	coding_exon	C56A3.8	C56A3.8	missense	G->E
a_pair5	none of the tested deficiencies	TRUE	TRUE	GE2886	t2055	het	het	V	13560787	G	A	SNV	coding_exon	C56A3.8	C56A3.8	missense	E->K
a_pair5	none of the tested deficiencies	FALSE	TRUE	GE2886	t2055	het	hom	V	19520740	T	C	SNV	intron	Y43F8B.2	Y43F8B.2
a_pair5	none of the tested deficiencies	FALSE	TRUE	GE2734	t2029	het	het	V	19524937	G	A	SNV	intron	Y43F8B.2	Y43F8B.2
c	none of the tested deficiencies	FALSE	FALSE	GE2112	t2037	het	het	V	2103786	G	A	SNV	coding_exon	F22F7.4	F22F7.4	missense	P->S
c	none of the tested deficiencies	FALSE	FALSE	GE2326	t2106	het	het	V	2104181	T	G	SNV	coding_exon	F22F7.4	F22F7.4	missense	T->P
c	none of the tested deficiencies	FALSE	FALSE	GE2326	t2106	het	het	V	6168147	C	T	SNV	coding_exon	W06H8.8	ttn-1	missense	E->K
c	none of the tested deficiencies	FALSE	FALSE	GE2112	t2037	het	het	V	6193663	G	A	SNV	coding_exon	W06H8.8	ttn-1	synonymous	R->R
c	none of the tested deficiencies	TRUE	TRUE	GE2326	t2106	het	het	V	10720741	C	T	SNV	intron	T28B11.1	T28B11.1
c	none of the tested deficiencies	TRUE	TRUE	GE2112	t2037	het	het	V	10726640	A	T	SNV	intron	T28B11.1	T28B11.1
c	none of the tested deficiencies	FALSE	TRUE	GE2112	t2037	het	het	V	11740325	G	A	SNV	coding_exon	T04F3.1	T04F3.1	synonymous	E->E
c	none of the tested deficiencies	FALSE	TRUE	GE2326	t2106	het	het	V	11744838	C	T	SNV	coding_exon	T04F3.1	T04F3.1	missense	H->Y
c	none of the tested deficiencies	TRUE	TRUE	GE2326	t2106	het	het	V	12504254	G	T	SNV	coding_exon	T28H10.1	T28H10.1	missense	D->Y
c	none of the tested deficiencies	TRUE	TRUE	GE2326	t2106	het	het	V	12504522	C	T	SNV	intron	T28H10.1	T28H10.1
c	none of the tested deficiencies	TRUE	TRUE	GE2112	t2037	het	het	V	12504680	G	A	SNV	coding_exon	T28H10.1	T28H10.1	nonsense	W->*
c	none of the tested deficiencies	FALSE	TRUE	GE2112	t2037	het	het	V	14692219	C	T	SNV	coding_exon	C47E8.7	unc-112	missense	R->Q
c	none of the tested deficiencies	FALSE	TRUE	GE2326	t2106	het	het	V	14696546	C	T	SNV	intron	C47E8.7	unc-112	splicing
f	none of the tested deficiencies	FALSE	FALSE	GE2078	t2033	het	het	V	8031710	G	A	SNV	coding_exon	ZC513.4	vars-1	missense	G->D
f	none of the tested deficiencies	FALSE	FALSE	GE2134	t2079	het	het	V	8033613	G	A	SNV	coding_exon	ZC513.4	vars-1	missense	V->M
f	none of the tested deficiencies	TRUE	TRUE	GE2078	t2033	het	het	V	11612449	C	T	SNV	coding_exon	F35B12.5	sas-5	missense	R->C
f	none of the tested deficiencies	TRUE	TRUE	GE2134	t2079	het	het	V	11612449	C	T	SNV	coding_exon	F35B12.5	sas-5	missense	R->C
f	none of the tested deficiencies	TRUE	TRUE	GE2134	t2079	het	het	V	12650601	T	A	SNV	intron	F56H9.5	lin-25	splicing
f	none of the tested deficiencies	TRUE	TRUE	GE2078	t2033	het	het	V	12654788	C	T	SNV	intron	F56H9.5	lin-25
g	none of the tested deficiencies	TRUE	TRUE	GE2386	t2165	het	het	V	10660827	G	A	SNV	coding_exon	F29F11.1	sqv-4	missense	P->L
g	none of the tested deficiencies	TRUE	TRUE	GE2059	t2025	het	het	V	10661143	G	A	SNV	coding_exon	F29F11.1	sqv-4	missense	S->L
V	none of the tested deficiencies	FALSE	FALSE	GE2304	t2129	het	het	V	9637326	A	T	SNV	coding_exon	T06E4.3	atl-1	nonsense	L->*
V	none of the tested deficiencies	FALSE	FALSE	GE2142	t2074	het	het	V	9642828	C	T	SNV	coding_exon	T06E4.3	atl-1	synonymous	S->S
V	none of the tested deficiencies	FALSE	TRUE	GE2142	t2074	het	het	V	10444593	C	T	SNV	coding_exon	Y32F6A.3	pap-1	missense	L->F
V	none of the tested deficiencies	FALSE	TRUE	GE2304	t2129	het	het	V	10445107	T	C	SNV	intron	Y32F6A.3	pap-1
V	none of the tested deficiencies	FALSE	TRUE	GE2142	t2074	het	het	V	13679756	T	A	SNV	coding_exon	F58G11.6	ccz-1	nonsense	Y->*
V	none of the tested deficiencies	FALSE	TRUE	GE2142	t2074	het	het	V	13680077	G	A	SNV	coding_exon	F58G11.6	ccz-1	synonymous	R->R
V	none of the tested deficiencies	FALSE	TRUE	GE2304	t2129	het	hom	V	13680792	C	T	SNV	coding_exon	F58G11.6	ccz-1	nonsense	Q->*
V	none of the tested deficiencies	FALSE	TRUE	GE2304	t2129	het	het	V	14234566	C	T	SNV	intron	K02E11.1	ent-3
V	none of the tested deficiencies	FALSE	TRUE	GE2142	t2074	het	het	V	14234937	T	A	SNV	coding_exon	K02E11.1	ent-3	synonymous	S->S
W	none of the tested deficiencies	TRUE	TRUE	GE2497	t2137	het	het	V	10735712	G	A	SNV	coding_exon	ZC302.1	mre-11	missense	H->Y
W	none of the tested deficiencies	TRUE	TRUE	GE2103	t2092	het	het	V	10736080	A	G	SNV	coding_exon	ZC302.1	mre-11	missense	F->S
W	none of the tested deficiencies	TRUE	TRUE	GE2497	t2137	het	het	V	13338502	C	T	SNV	coding_exon	C50B6.10	str-4	missense	M->I
W	none of the tested deficiencies	TRUE	TRUE	GE2103	t2092	het	het	V	13339111	G	A	SNV	intron	C50B6.10	str-4
gene-4	sDf110	FALSE	FALSE	GE2275	t1517	het	het	III	7391729	G	A	SNV	UTR	T20B12.9	lgc-50
gene-4	sDf110	FALSE	FALSE	GE2357	t1527	het	het	III	7395136	A	G	SNV	intron	T20B12.9	lgc-50
gene-4	sDf110	TRUE	TRUE	GE2275	t1517	het	het	III	9055405	G	A	SNV	coding_exon	R107.6	cls-2	missense	R->Q
gene-4	sDf110	TRUE	TRUE	GE2357	t1527	het	het	III	9055440	G	A	SNV	coding_exon	R107.6	cls-2	missense	G->R
gene-4	sDf110	FALSE	FALSE	GE2275	t1517	het	het	III	11977495	G	A	SNV	coding_exon	Y56A3A.30	Y56A3A.30	nonsense	Q->*
gene-4	sDf110	FALSE	FALSE	GE2357	t1527	het	het	III	11978799	G	A	SNV	coding_exon	Y56A3A.30	Y56A3A.30	synonymous	S->S
gene-4	sDf110	FALSE	FALSE	GE2275	t1517	het	het	III	12500638	G	A	SNV	intron	Y111B2A.4	sql-1
gene-4	sDf110	FALSE	FALSE	GE2357	t1527	het	het	III	12500852	G	A	SNV	intron	Y111B2A.4	sql-1
gene-10	sDf125	FALSE	FALSE	GE2740	t1576	het	het	III	2920499	C	T	SNV	intron	R10F2.1	cdh-1
gene-10	sDf125	FALSE	FALSE	GE1731	t1456	het	het	III	2935740	G	A	SNV	UTR	R10F2.1	cdh-1
gene-10	sDf125	TRUE	TRUE	GE2740	t1576	het	het	III	6440655	C	T	SNV	coding_exon	C05D11.11	mel-32	missense	G->R
gene-10	sDf125	TRUE	TRUE	GE1731	t1456	het	het	III	6440831	C	T	SNV	coding_exon	C05D11.11	mel-32	missense	G->E
gene-10	sDf125	FALSE	FALSE	GE1731	t1456	het	het	III	12261858	C	T	SNV	coding_exon	Y75B8A.24	Y75B8A.24	synonymous	L->L
gene-10	sDf125	FALSE	FALSE	GE2740	t1576	het	het	III	12269424	C	T	SNV	intron	Y75B8A.24	Y75B8A.24
gene-10	sDf125	FALSE	FALSE	GE2740	t1576	het	het	III	13373270	C	T	SNV	intron	T03F6.5	lis-1
gene-10	sDf125	FALSE	FALSE	GE1731	t1456	het	het	III	13373825	C	T	SNV	intron	T03F6.5	lis-1
gene-8	sDf125	FALSE	FALSE	GE1725	t1437	het	het	III	13094481	C	T	SNV	intron	Y39E4B.3	pqn-83
gene-8	sDf125	FALSE	FALSE	GE2359	t1478	het	het	III	13094520	C	T	SNV	intron	Y39E4B.3	pqn-83
gene-8	sDf125	FALSE	FALSE	GE1725	t1437	het	het	III	13095180	C	G	SNV	intron	Y39E4B.3	pqn-83
A	sDf2	TRUE	TRUE	GE2447	t1879	het	het	IV	11180120	C	T	SNV	coding_exon	R07H5.2	cpt-2	nonsense	Q->*
A	sDf2	TRUE	TRUE	GE1938	t1742	homo	het	IV	11180603	G	A	SNV	coding_exon	R07H5.2	cpt-2	nonsense	W->*
H	sDf2	FALSE	FALSE	GE1936	t1738	het	het	IV	5655164	C	T	SNV	intron	T19E7.2	skn-1
H	sDf2	FALSE	FALSE	GE1958	t1726	het	het	IV	5657212	G	A	SNV	intron	T19E7.2	skn-1
H	sDf2	FALSE	FALSE	GE1936	t1738	het	het	IV	8569420	C	T	SNV	coding_exon	Y59H11AM.4	Y59H11AM.4	missense	S->N
H	sDf2	FALSE	FALSE	GE1958	t1726	het	het	IV	8570207	G	A	SNV	intron	Y59H11AM.4	Y59H11AM.4
H	sDf2	TRUE	TRUE	GE1958	t1726	het	het	IV	11079764	G	A	SNV	coding_exon	M7.5	atg-7	nonsense	Q->*
H	sDf2	TRUE	TRUE	GE1936	t1738	het	het	IV	11079973	C	T	SNV	coding_exon	M7.5	atg-7	nonsense	W->*
H	sDf2	TRUE	TRUE	GE1958	t1726	het	het	IV	11914534	G	A	SNV	coding_exon	VZK822L.1	fat-6	synonymous	F->F
H	sDf2	TRUE	TRUE	GE1936	t1738	het	het	IV	11914638	C	T	SNV	coding_exon	VZK822L.1	fat-6	missense	A->T
I	sDf2 and sDf21	FALSE	FALSE	GE2514	t1912	het	het	IV	1080928	CTTTTTTTTT	CTTTTTTTTTT	insertion	intron	Y55F3AM.15	csn-4
I	sDf2 and sDf21	FALSE	FALSE	GE2003	t1817	het	het	IV	1081511	C	T	SNV	intron	Y55F3AM.15	csn-4
I	sDf2 and sDf21	FALSE	FALSE	GE2003	t1817	het	het	IV	1081512	C	T	SNV	intron	Y55F3AM.15	csn-4
I	sDf2 and sDf21	FALSE	FALSE	GE2003	t1817	het	het	IV	9201830	C	T	SNV	intron	C46C2.1	wnk-1
I	sDf2 and sDf21	FALSE	FALSE	GE2514	t1912	het	het	IV	9208547	T	A	SNV	intron	C46C2.1	wnk-1
I	sDf2 and sDf21	TRUE	TRUE	GE2003	t1817	het	het	IV	12569291	C	T	SNV	coding_exon	K08E7.3	let-99	nonsense	Q->*
I	sDf2 and sDf21	TRUE	TRUE	GE2514	t1912	het	het	IV	12570199	C	T	SNV	coding_exon	K08E7.3	let-99	missense	L->F
I	sDf2 and sDf21	TRUE	FALSE	GE2003	t1817	het	het	IV	12607532	T	C	SNV	intron	Y55D9A.1	efa-6
I	sDf2 and sDf21	TRUE	FALSE	GE2003	t1817	het	het	IV	12607533	G	T	SNV	intron	Y55D9A.1	efa-6
I	sDf2 and sDf21	TRUE	FALSE	GE2514	t1912	het	het	IV	12609591	GTTTTTTT	GTTTTTTTT	insertion	intron	Y55D9A.1	efa-6
w	sDf2 and sDf21	FALSE	FALSE	GE2442	t1920	het	het	IV	5503562	C	T	SNV	intron	B0273.4	unc-5
w	sDf2 and sDf21	FALSE	FALSE	GE1998	t1790	het	het	IV	5515415	G	A	SNV	intron	B0273.4	unc-5
M	sDf21	FALSE	FALSE	GE1999	t1793	het	het	IV	4250047	C	T	SNV	coding_exon	F36A4.7	ama-1	missense	A->V
M	sDf21	FALSE	FALSE	GE2093	t1800	het	het	IV	4252367	C	T	SNV	coding_exon	F36A4.7	ama-1	missense	L->F
M	sDf21	FALSE	FALSE	GE1999	t1793	het	het	IV	6168131	G	A	SNV	coding_exon	C11D2.6	unc-77	missense	T->I
M	sDf21	FALSE	FALSE	GE2093	t1800	het	het	IV	6170244	C	T	SNV	intron	C11D2.6	unc-77
M	sDf21	FALSE	FALSE	GE1999	t1793	het	het	IV	6177231	G	A	SNV	intron	C11D2.6	unc-77
M	sDf21	FALSE	FALSE	GE1999	t1793	het	het	IV	8066150	C	T	SNV	intron	C18F3.2	sax-7
M	sDf21	FALSE	FALSE	GE2093	t1800	het	het	IV	8072088	T	A	SNV	intron	C18F3.2	sax-7
M	sDf21	TRUE	TRUE	GE1999	t1793	het	het	IV	13079842	C	T	SNV	intron	C39E9.8	C39E9.8
M	sDf21	TRUE	TRUE	GE2093	t1800	het	het	IV	13081765	C	T	SNV	UTR	C39E9.8	C39E9.8
M	sDf21	TRUE	FALSE	GE1999	t1793	het	het	IV	13354014	T	G	SNV	coding_exon	W02A2.7	mex-5	nonsense	Y->*
M	sDf21	TRUE	FALSE	GE2093	t1800	het	hom	IV	13354478	T	A	SNV	coding_exon	W02A2.7	mex-5	nonsense	L->*
M	sDf21	FALSE	FALSE	GE2093	t1800	het	het	IV	14884187	C	T	SNV	intron	Y57G11C.24	eps-8
M	sDf21	FALSE	FALSE	GE1999	t1793	het	het	IV	14890774	G	A	SNV	intron	Y57G11C.24	eps-8
x	sDf21	FALSE	FALSE	GE2289	t1836	het	het	IV	3388459	C	T	SNV	intron	B0546.5	B0546.5
x	sDf21	FALSE	FALSE	GE2314	t1724	het	het	IV	3388459	C	T	SNV	intron	B0546.5	B0546.5
x	sDf21	TRUE	FALSE	GE2314	t1724	het	het	IV	13414105	A	G	SNV	coding_exon	Y62E10A.17	aptf-2	missense	L->P
x	sDf21	TRUE	FALSE	GE2289	t1836	het	het	IV	13414263	G	T	SNV	coding_exon	Y62E10A.17	aptf-2	nonsense	C->*
z	sDf21	TRUE	TRUE	GE2130	t1765	het	het	IV	12595773	C	T	SNV	coding_exon	K08E7.9	pgp-1	missense	G->E
z	sDf21	TRUE	TRUE	GE2503	t1888	het	het	IV	12596445	T	A	SNV	coding_exon	K08E7.9	pgp-1	synonymous	S->S
z	sDf21	TRUE	TRUE	GE2130	t1765	het	het	IV	13033086	C	T	SNV	coding_exon	F49E11.1	mbk-2	missense	R->C
z	sDf21	TRUE	TRUE	GE2503	t1888	het	het	IV	13033644	C	T	SNV	coding_exon	F49E11.1	mbk-2	missense	P->L
gene-40	sDf28	TRUE	FALSE	GE2656	t1701	het	het	III	4128826	G	A	SNV	coding_exon	C30D11.1	unc-103	missense	G->E
gene-40	sDf28	TRUE	FALSE	GE2596	t1663	het	het	III	4133473	C	T	SNV	intron	C30D11.1	unc-103
gene-41	sDf28	TRUE	TRUE	GE2629	t1595	het	het	III	2348780	C	T	SNV	coding_exon	H04J21.3	gip-1	synonymous	G->G
gene-41	sDf28	TRUE	TRUE	GE2629	t1595	het	het	III	2348884	G	A	SNV	coding_exon	H04J21.3	gip-1	missense	C->Y
gene-41	sDf28	TRUE	TRUE	GE2207	t1539 t1541	het	het	III	2351589	G	A	SNV	intron	H04J21.3	gip-1
e	sDf35	TRUE	TRUE	GE2086	t2093	het	het	V	9390094	C	T	SNV	intron	F36D4.3	hum-2
e	sDf35	TRUE	TRUE	GE2733	t2008	het	het	V	9393626	C	T	SNV	coding_exon	F36D4.3	hum-2	synonymous	L->L
S	sDf35	TRUE	TRUE	GE2511	t2162	het	het	V	8356808	T	G	SNV	coding_exon	F38E1.7	mom-2	missense	C->G
S	sDf35	TRUE	TRUE	GE2523	t2180	het	hom	V	8357121	T	C	SNV	coding_exon	F38E1.7	mom-2	missense	C->R
T	sDf35	FALSE	FALSE	GE2449	t2143	het	het	V	4505656	C	T	SNV	intron	T28F12.2	unc-62
T	sDf35	FALSE	FALSE	GE2467	t2155	het	het	V	4506806	C	T	SNV	intron	T28F12.2	unc-62
T	sDf35	TRUE	TRUE	GE2449	t2143	het	het	V	9635587	C	T	SNV	coding_exon	T06E4.3	atl-1	nonsense	W->*
T	sDf35	TRUE	TRUE	GE2467	t2155	het	het	V	9637978	C	T	SNV	coding_exon	T06E4.3	atl-1	missense	E->K
T	sDf35	FALSE	FALSE	GE2449	t2143	het	het	V	20209240	G	A	SNV	coding_exon	Y113G7B.12	Y113G7B.12	missense	P->L
T	sDf35	FALSE	FALSE	GE2467	t2155	het	hom	V	20209965	G	A	SNV	coding_exon	Y113G7B.12	Y113G7B.12	synonymous	N->N
U_pair1	sDf35	FALSE	FALSE	GE2101	t2080	het	het	V	589208	C	T	SNV	intron	K06H6.1	K06H6.1
U_pair1	sDf35	FALSE	FALSE	GE2393	t2183	het	het	V	589321	C	T	SNV	coding_exon	K06H6.1	K06H6.1	missense	P->S
U_pair1	sDf35	TRUE	FALSE	GE2393	t2183	het	het	V	7466946	A	T	SNV	coding_exon	F25E5.1	F25E5.1	missense	D->V
U_pair1	sDf35	TRUE	FALSE	GE2101	t2080	het	het	V	7471131	C	T	SNV	UTR	F25E5.1	F25E5.1
U_pair1	sDf35	TRUE	TRUE	GE2101	t2080	het	het	V	10014729	T	C	SNV	intron	K08H10.1	lea-1
U_pair1	sDf35	TRUE	TRUE	GE2393	t2183	het	het	V	10025701	C	T	SNV	coding_exon	K08H10.1	lea-1	missense	A->V
U_pair1	sDf35	FALSE	FALSE	GE2393	t2183	het	het	V	12226849	G	A	SNV	UTR	K12F2.1	myo-3
U_pair1	sDf35	FALSE	FALSE	GE2101	t2080	het	het	V	12229325	C	T	SNV	coding_exon	K12F2.1	myo-3	missense	G->E
U_pair1	sDf35	FALSE	FALSE	GE2393	t2183	het	het	V	15876179	C	T	SNV	intron	T06C12.6	nhr-102
U_pair1	sDf35	FALSE	FALSE	GE2101	t2080	het	het	V	15876372	G	A	SNV	coding_exon	T06C12.6	nhr-102	synonymous	S->S
U_pair2	sDf35	TRUE	TRUE	GE3128	t2177	het	het	V	8414544	G	A	SNV	intron	F52E1.1	pos-1	splicing
U_pair2	sDf35	TRUE	TRUE	GE2101	t2080	het	het	V	8414579	T	A	SNV	coding_exon	F52E1.1	pos-1	missense	V->D
U_pair2	sDf35	FALSE	FALSE	GE3128	t2177	het	het	V	12041694	G	A	SNV	coding_exon	F10C2.4	F10C2.4	missense	V->I
U_pair2	sDf35	FALSE	FALSE	GE2101	t2080	het	het	V	12044626	C	T	SNV	coding_exon	F10C2.4	F10C2.4	missense	P->L
U_pair3	sDf35	FALSE	FALSE	GE3129	t2181	het	het	V	4358099	A	C	SNV	intron	F32D1.3	F32D1.3
U_pair3	sDf35	FALSE	FALSE	GE2101	t2080	het	het	V	4360730	C	T	SNV	intron	F32D1.3	F32D1.3
U_pair3	sDf35	FALSE	FALSE	GE2101	t2080	het	het	V	4575870	T	A	SNV	intron	Y61A9LA.3	Y61A9LA.3
U_pair3	sDf35	FALSE	FALSE	GE3129	t2181	het	het	V	4580034	T	A	SNV	coding_exon	Y61A9LA.3	Y61A9LA.3	readthrough	*->R
U_pair3	sDf35	FALSE	FALSE	GE3129	t2181	het	het	V	5165002	C	T	SNV	intron	C03A7.14	abu-8
U_pair3	sDf35	FALSE	FALSE	GE2101	t2080	het	het	V	5180555	C	T	SNV	intron	C03A7.14	abu-8
U_pair4	sDf35	TRUE	FALSE	GE2393	t2183	het	het	V	7127035	G	A	SNV	coding_exon	T01C4.1	lmd-5	missense	G->S
U_pair4	sDf35	TRUE	FALSE	GE3128	t2177	het	het	V	7127832	G	A	SNV	coding_exon	T01C4.1	lmd-5	synonymous	T->T
U_pair4	sDf35	TRUE	TRUE	GE2393	t2183	het	het	V	8430295	C	T	SNV	intron	F52E1.13	lmd-3
U_pair4	sDf35	TRUE	TRUE	GE3128	t2177	het	het	V	8431974	G	A	SNV	intron	F52E1.13	lmd-3
U_pair6	sDf35	FALSE	FALSE	GE3129	t2181	het	het	V	4857484	C	T	SNV	coding_exon	C37H5.13	C37H5.13	synonymous	S->S
U_pair6	sDf35	FALSE	FALSE	GE3128	t2177	het	het	V	4858080	G	A	SNV	intron	C37H5.13	C37H5.13
U_pair6	sDf35	FALSE	FALSE	GE3129	t2181	het	het	V	6160699	C	T	SNV	coding_exon	W06H8.8	ttn-1	missense	A->T
U_pair6	sDf35	FALSE	FALSE	GE3128	t2177	het	het	V	6167417	G	A	SNV	coding_exon	W06H8.8	ttn-1	missense	A->V
U_pair6	sDf35	FALSE	FALSE	GE3129	t2181	het	het	V	14796983	G	A	SNV	UTR	C48G7.3	rin-1
U_pair6	sDf35	FALSE	FALSE	GE3128	t2177	het	het	V	14811527	G	A	SNV	intron	C48G7.3	rin-1
Y	sDf35	FALSE	FALSE	GE2430	t2135	het	het	V	6167844	C	T	SNV	coding_exon	W06H8.8	ttn-1	missense	E->K
Y	sDf35	FALSE	FALSE	GE2337	t2095	het	het	V	6180567	T	C	SNV	coding_exon	W06H8.8	ttn-1	synonymous	V->V
Y	sDf35	TRUE	TRUE	GE2430	t2135	het	het	V	8221773	C	T	SNV	coding_exon	K07C11.2	air-1	missense	R->C
Y	sDf35	TRUE	TRUE	GE2337	t2095	het	het	V	8223169	CAT	C	deletion	coding_exon	K07C11.2	air-1	frameshift
D	stDf7 and not nDf41	FALSE	FALSE	GE1929	t1729	het	het	IV	3112606	G	A	SNV	intron	Y67D8C.10	mca-3
D	stDf7 and not nDf41	FALSE	FALSE	GE2452	t1897	het	het	IV	3112968	G	A	SNV	intron	Y67D8C.10	mca-3
D	stDf7 and not nDf41	TRUE	TRUE	GE2452	t1897	het	het	IV	7959252	G	A	SNV	intron	F20D12.1	csr-1	splicing
D	stDf7 and not nDf41	TRUE	TRUE	GE1929	t1729	het	het	IV	7960467	T	A	SNV	coding_exon	F20D12.1	csr-1	missense	N->K
D	stDf7 and not nDf41	TRUE	TRUE	GE1929	t1729	het	het	IV	7961246	G	A	SNV	coding_exon	F20D12.1	csr-1	missense	G->E
D	stDf7 and not nDf41	TRUE	FALSE	GE1929	t1729	het	het	IV	12594785	G	A	SNV	intron	K08E7.9	pgp-1
D	stDf7 and not nDf41	TRUE	FALSE	GE2452	t1897	het	het	IV	12595794	C	T	SNV	coding_exon	K08E7.9	pgp-1	missense	G->D
D	stDf7 and not nDf41	TRUE	FALSE	GE2452	t1897	het	het	IV	17081077	C	T	SNV	intron	Y116A8C.26	snx-13
D	stDf7 and not nDf41	TRUE	FALSE	GE1929	t1729	het	het	IV	17087371	A	C	SNV	UTR	Y116A8C.26	snx-13
gene-14	tDf5	FALSE	FALSE	GE2348	t1518	het	het	III	7762274	G	A	SNV	coding_exon	ZC97.1	mtx-2	missense	L->F
gene-14	tDf5	FALSE	FALSE	GE2362	t1547	het	het	III	7763477	C	T	SNV	intron	ZC97.1	mtx-2
gene-14	tDf5	TRUE	TRUE	GE2348	t1518	het	het	III	12063671	C	T	SNV	coding_exon	Y79H2A.11	zyg-8	nonsense	R->*
gene-14	tDf5	TRUE	TRUE	GE2362	t1547	het	het	III	12063832	G	A	SNV	intron	Y79H2A.11	zyg-8	splicing
gene-15	tDf5	FALSE	FALSE	GE2220	t1516	het	het	III	1182169	C	T	SNV	coding_exon	Y119D3B.13	Y119D3B.13	missense	L->F
gene-15	tDf5	FALSE	FALSE	GE2399	t1559	het	het	III	1182169	C	T	SNV	coding_exon	Y119D3B.13	Y119D3B.13	missense	L->F
gene-15	tDf5	FALSE	FALSE	GE2220	t1516	het	het	III	6635188	C	T	SNV	coding_exon	C13B9.4	pdfr-1	missense	V->I
gene-15	tDf5	FALSE	FALSE	GE2399	t1559	het	het	III	6641488	G	A	SNV	intron	C13B9.4	pdfr-1
gene-15	tDf5	FALSE	FALSE	GE2399	t1559	het	het	III	8541759	G	A	SNV	coding_exon	ZC21.2	trp-1	missense	S->N
gene-15	tDf5	FALSE	FALSE	GE2220	t1516	het	het	III	8542095	C	T	SNV	coding_exon	ZC21.2	trp-1	missense	P->L
gene-15	tDf5	FALSE	FALSE	GE2399	t1559	het	het	III	10409316	G	A	SNV	intron	M03C11.3	M03C11.3
gene-15	tDf5	FALSE	FALSE	GE2220	t1516	het	het	III	10411835	T	A	SNV	coding_exon	M03C11.3	M03C11.3	missense	N->K
gene-15	tDf5	TRUE	TRUE	GE2399	t1559	het	het	III	11951381	G	A	SNV	coding_exon	Y56A3A.27	top-3	nonsense	Q->*
gene-15	tDf5	TRUE	TRUE	GE2220	t1516	het	het	III	11958680	C	T	SNV	coding_exon	Y56A3A.27	top-3	missense	G->R
gene-17	tDf5	FALSE	FALSE	GE2627	t1603	het	het	III	10446853	C	T	SNV	coding_exon	H04D03.4	H04D03.4	missense	E->K
gene-17	tDf5	FALSE	FALSE	GE2206	t1514	het	het	III	10448260	G	A	SNV	coding_exon	H04D03.4	H04D03.4	synonymous	D->D
gene-17	tDf5	TRUE	TRUE	GE2206	t1514	het	het	III	12971273	G	A	SNV	coding_exon	Y39E4A.3	bckd-1A	nonsense	Q->*
gene-17	tDf5	TRUE	TRUE	GE2627	t1603	het	het	III	12971305	C	T	SNV	coding_exon	Y39E4A.3	bckd-1A	nonsense	W->*
gene-18	tDf5	FALSE	FALSE	GE2343	t1521	het	het	III	4220329	T	G	SNV	intron	F43C1.2	mpk-1
gene-18	tDf5	FALSE	FALSE	GE2211	t1476	het	het	III	4222274	G	A	SNV	intron	F43C1.2	mpk-1
gene-18	tDf5	FALSE	FALSE	GE2343	t1521	het	het	III	8830141	G	A	SNV	coding_exon	F44E2.10	F44E2.10	missense	R->C
gene-18	tDf5	FALSE	FALSE	GE2211	t1476	het	het	III	8831090	G	A	SNV	coding_exon	F44E2.10	F44E2.10	missense	S->F
gene-18	tDf5	FALSE	FALSE	GE2343	t1521	het	het	III	11170997	G	A	SNV	UTR	Y47D3A.6	tra-1
gene-18	tDf5	FALSE	FALSE	GE2211	t1476	het	het	III	11181884	C	T	SNV	intron	Y47D3A.6	tra-1
gene-18	tDf5	TRUE	TRUE	GE2211	t1476	het	het	III	11895786	C	T	SNV	intron	Y56A3A.11	tsen-2
gene-18	tDf5	TRUE	TRUE	GE2343	t1521	het	het	III	11898226	G	A	SNV	coding_exon	Y56A3A.11	tsen-2	missense	H->Y
gene-18	tDf5	TRUE	TRUE	GE2211	t1476	het	het	III	12710102	C	T	SNV	coding_exon	Y111B2A.24	sas-1	missense	P->S
gene-18	tDf5	TRUE	TRUE	GE2343	t1521	het	het	III	12710202	G	A	SNV	coding_exon	Y111B2A.24	sas-1	missense	G->E
gene-34	none of the tested deficiencies	TRUE	TRUE	GE1745	t1464	het	het	III	1867738	C	T	SNV	intron	Y39A3CR.3	ttc-7
gene-34	none of the tested deficiencies	TRUE	TRUE	GE2278	t1502	het	het	III	1869876	C	T	SNV	intron	Y39A3CR.3	ttc-7
gene-34	none of the tested deficiencies	FALSE	FALSE	GE1745	t1464	het	het	III	8290018	C	T	SNV	intron	F10E9.6	mig-10
gene-34	none of the tested deficiencies	FALSE	FALSE	GE2278	t1502	het	het	III	8302815	C	T	SNV	intron	F10E9.6	mig-10
gene-34	none of the tested deficiencies	FALSE	FALSE	GE2278	t1502	het	het	III	11886902	G	A	SNV	coding_exon	Y56A3A.5	faah-5	missense	P->S
gene-34	none of the tested deficiencies	FALSE	FALSE	GE1745	t1464	het	het	III	11888285	G	A	SNV	intron	Y56A3A.5	faah-5
gene-34	none of the tested deficiencies	FALSE	FALSE	GE2278	t1502	het	het	III	11951521	G	A	SNV	coding_exon	Y56A3A.27	top-3	missense	P->L
gene-34	none of the tested deficiencies	FALSE	FALSE	GE1745	t1464	het	het	III	11951669	C	T	SNV	coding_exon	Y56A3A.27	top-3	missense	G->R
gene-19	tDf6	FALSE	FALSE	GE2590	t1657	het	het	III	8506592	C	T	SNV	intron	C04D8.1	pac-1
gene-19	tDf6	FALSE	FALSE	GE2611	t1675	het	het	III	8511382	G	A	SNV	intron	C04D8.1	pac-1
gene-20	tDf6	FALSE	FALSE	GE2579	t1644	het	het	III	6034566	G	A	SNV	coding_exon	ZK328.7	ZK328.7	missense	A->V
gene-20	tDf6	FALSE	FALSE	GE2597	t1664	het	het	III	6038086	G	A	SNV	intron	ZK328.7	ZK328.7
gene-20	tDf6	TRUE	TRUE	GE2597	t1664	het	het	III	13688952	G	A	SNV	intron	ZK520.4	cul-2	splicing
gene-20	tDf6	TRUE	TRUE	GE2579	t1644	het	het	III	13689224	G	A	SNV	intron	ZK520.4	cul-2
gene-21	tDf6	TRUE	TRUE	GE2237	t1614	het	het	III	13518266	G	A	SNV	coding_exon	Y76A2B.1	pod-1	missense	A->V
gene-21	tDf6	TRUE	TRUE	GE2605	t1674	het	het	III	13518357	G	A	SNV	coding_exon	Y76A2B.1	pod-1	nonsense	R->*
gene-22	tDf6	FALSE	FALSE	GE2730	t1550	het	het	III	3599028	C	T	SNV	intron	C48D5.2	ptp-1
gene-22	tDf6	FALSE	FALSE	GE2730	t1550	het	hom	III	3605228	C	T	SNV	intron	C48D5.2	ptp-1
gene-22	tDf6	FALSE	FALSE	GE2653	t1698	het	het	III	3607720	C	T	SNV	coding_exon	C48D5.2	ptp-1	missense	S->L
gene-22	tDf6	FALSE	FALSE	GE2653	t1698	het	het	III	8516419	G	A	SNV	coding_exon	C04D8.1	pac-1	missense	A->T
gene-22	tDf6	FALSE	FALSE	GE2730	t1550	het	het	III	8517558	C	T	SNV	coding_exon	C04D8.1	pac-1	missense	A->V
gene-22	tDf6	FALSE	FALSE	GE2730	t1550	het	het	III	12149781	C	T	SNV	lincRNA	Y75B8A.61	linc-87
gene-22	tDf6	FALSE	FALSE	GE2653	t1698	het	het	III	12150204	C	T	SNV	lincRNA	Y75B8A.61	linc-87
gene-22	tDf6	TRUE	TRUE	GE2730	t1550	het	het	III	13375376	C	T	SNV	coding_exon	T03F6.5	lis-1	nonsense	W->*
gene-22	tDf6	TRUE	TRUE	GE2653	t1698	het	het	III	13375401	C	T	SNV	intron	T03F6.5	lis-1	splicing
gene-6	tDf6	FALSE	FALSE	GE2367	t1563	het	het	III	1217932	C	T	SNV	intron	Y119D3B.17	pes-4
gene-6	tDf6	FALSE	FALSE	GE2264	t1628	het	het	III	1221200	C	T	SNV	coding_exon	Y119D3B.17	pes-4	synonymous	K->K
gene-6	tDf6	TRUE	TRUE	GE2367	t1563	het	het	III	13306451	A	T	SNV	coding_exon	Y43F4B.6	klp-19	missense	L->H
gene-6	tDf6	TRUE	TRUE	GE2367	t1563	het	het	III	13306457	G	A	SNV	coding_exon	Y43F4B.6	klp-19	missense	A->V
gene-6	tDf6	TRUE	TRUE	GE2264	t1628	het	het	III	13306872	C	T	SNV	coding_exon	Y43F4B.6	klp-19	missense	G->R
gene-5	tDf7	FALSE	FALSE	GE2277	t1496	het	het	III	2876069	C	T	SNV	intron	F56F11.3	klf-1
gene-5	tDf7	FALSE	FALSE	GE2666	t1693	het	het	III	2876147	G	A	SNV	intron	F56F11.3	klf-1
gene-5	tDf7	FALSE	FALSE	GE2277	t1496	het	het	III	7886967	G	A	SNV	coding_exon	ZK688.5	ZK688.5	missense	P->S
gene-5	tDf7	FALSE	FALSE	GE2277	t1496	het	het	III	7888228	G	A	SNV	coding_exon	ZK688.5	ZK688.5	missense	P->S
gene-5	tDf7	FALSE	FALSE	GE2666	t1693	het	het	III	7891501	G	A	SNV	coding_exon	ZK688.5	ZK688.5	synonymous	T->T
gene-5	tDf7	TRUE	FALSE	GE2277	t1496	het	het	III	11515520	G	A	SNV	coding_exon	Y66D12A.17	such-1	missense	L->F
gene-5	tDf7	TRUE	FALSE	GE2666	t1693	het	het	III	11515540	C	T	SNV	coding_exon	Y66D12A.17	such-1	missense	R->K
gene-5	tDf7	TRUE	FALSE	GE2277	t1496	het	het	III	11515883	G	A	SNV	coding_exon	Y66D12A.17	such-1	missense	H->Y

## Sheet: Deficiency Positions
Chromosome	Name of Deficiency	Gene Upstream of Deficiency	Position of Upstream Gene Boundary (Hard Limit)	First Gene Inside Deficiency	Position of First Gene (Soft Limit)	Last Gene Inside Deficiency	Position of Last Gene (Soft Limit)	Gene Downstream of Deficiency	Position of Downstream Gene Boundary (Hard Limit)
V	ctDf1	daf-11	V:11726071	sma-1	V:11899449	sqt-3	V:12354320	egl-10	V:12453290
IV	eDf19	nsy-7	IV:8086652	mes-6	IV:8511284	gon-4	IV:10202993	unc-43	IV:10324254
V	itDf2	rdy-2	V:13600982	egl-1	V:14431308	hsp-90	V:14688545	(unknown)	(unknown)
III	nDf16	let-756	III:6410033	odr-4	III:6730800	unc-116	III:8355174	dpy-19	III:8659872
V	nDf32	lin-40	V:3712796	unc-62	V:4497461	unc-70	V:6891839	unc-68	V:6901681
III	nDf40	emb-30	III:9441460	sqv-3	III:9778782	unc-49	III:10532705	(unknown)	(unknown)
IV	nDf41	(unknown)	(unknown)	rme-2	IV:5470026	egl-19	IV:7418740	ceh-19	IV:7953500
III	sDf110	unc-116	III:8355174	unc-32	III:8905615	glp-1	III:9099698	emb-30	III:9435507
III	sDf125	sma-4	III:5820204	let-767	III:6338508	let-765	III:6601173	sma-3	III:6860974
IV	sDf2	unc-43	IV:10324254	mec-3	IV:10458816	let-99	IV:12570622	unc-31	IV:12773867
IV	sDf21	unc-22	IV:12011007	lin-24	IV:12129504	unc-26	IV:13272516	tlp-1	IV:13701208
V	sDf28	unc-34	V:996914	ges-1	V:1427653	lin-40	V:3712796	unc-62	V:4497461
V	sDf35	mec-1	V:6966425	let-413	V:7973078	spe-10	V:10385740	cat-4	V:10564880
IV	stDf7	spd-3	IV:6765200	deb-1	IV:7085215	unc-24	IV:7982011	(unknown)	(unknown)
III	tDf5	tra-1	III:11195201	rab-35	III:11306647	lit-1	III:13724404	(unknown)	(unknown)
III	tDf6	pie-1	III:12429195	unc-71	III:12881043	cyk-4	III:13771224	(unknown)	(unknown)
III	tDf7	pha-1	III:11136688	rab-35	III:11306647	spe-6	III:11508930	zyg-8	III:12061713
